# Supplementary material for: Amberlite IR-120(H)-mediated “on water” synthesis of novel anticancer ruthenium(ii)–p-cymene 2-pyridinylbenzothiazole (BTZ), 2-pyridinylbenzoxazole (BOZ) & 2-pyridinylbenzimidazole (BIZ) scaffolds
Source: Royal Society of Chemistry journal article supplement (doi:10.1039/c6nj02049f), 2016-01-01
Supplement: c6nj02049f1.pdf [file c6nj02049f1.pdf]

## Supporting Materials

### **Amberlite IR-120(H) mediated “On water” synthesis of novel anticancer Ruthenium (II)-p-cymene 2-pyridinylbenzothiazole (BTZ), 2-pyridinylbenzoxazole (BOZ) & 2-pyridinylbenzimidazole (BIZ) scaffolds**

Sunisha K S<sup>†</sup>, Swagata Banerjee<sup>†</sup>, Ashaparna Mondal, Priyankar Paira,\*

*Department of Chemistry, School of advanced sciences, VIT University, Vellore-632014,  
Tamil Nadu, India*

|                                                                                                |           |
|------------------------------------------------------------------------------------------------|-----------|
| <sup>1</sup> H NMR, <sup>13</sup> C NMR, ESI-MS spectra of compounds <b>3a-g</b> & <b>4a-g</b> | Page 2-32 |
| Fluorescence spectra of compounds 3a, 3g & 4a, 4g in different solvents                        | Page 33   |
| Reusability of Amberlite IR-120 resin for the synthesis of complex <b>4a</b>                   | Page 33   |
| <i>In vitro</i> cytotoxic activities (MTT assay)                                               | Page 34   |
| References                                                                                     | Page 34   |

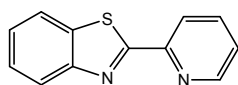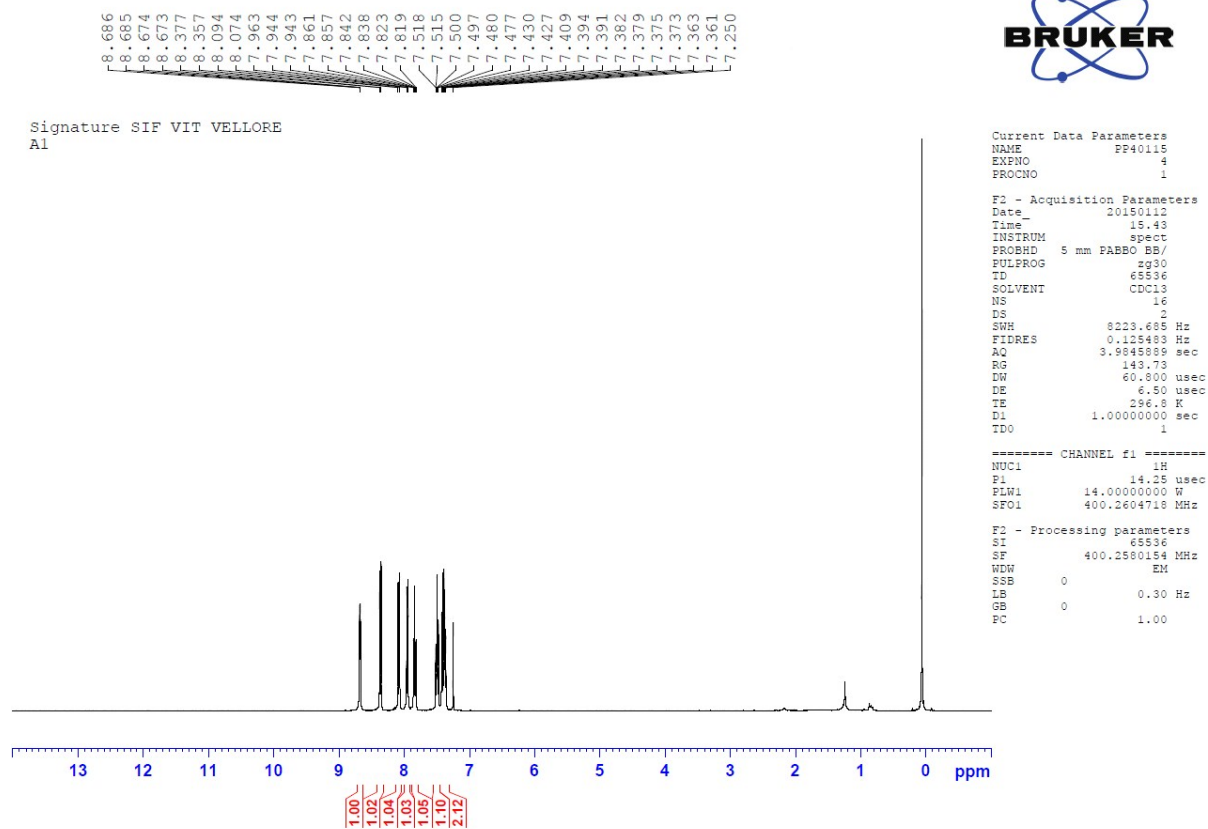

**Figure S1-<sup>1</sup>H NMR of ligand 3a**



Signature SIF VIT VELLORE  
A1

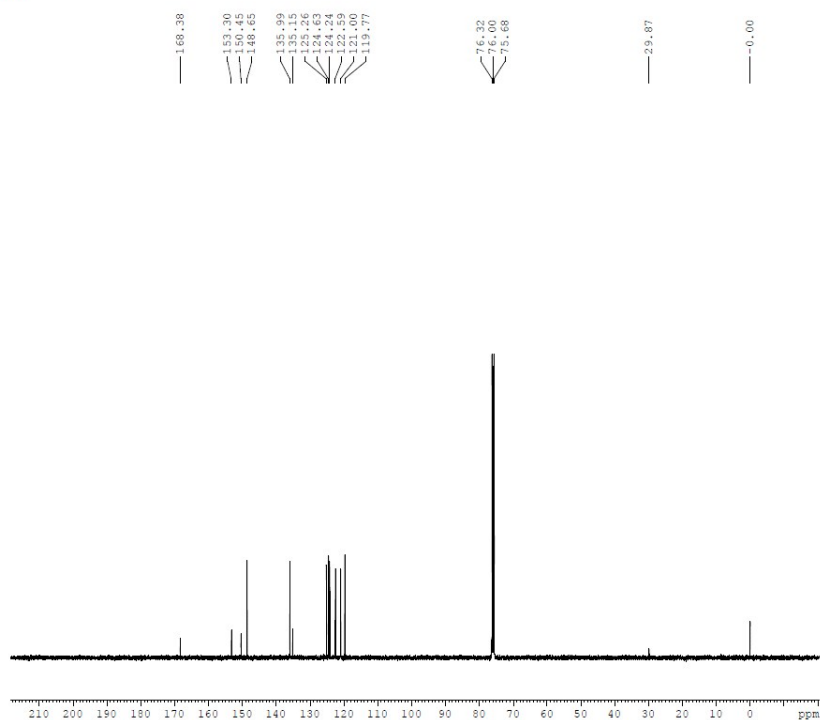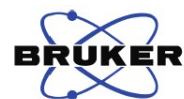

Current Data Parameters  
NAME PF40113  
EXPNO 6  
PROCNO 1

F2 - Acquisition Parameters  
Date\_ 20150113  
Time\_ 2.23  
INSTRUM spect  
PROBHD 5 mm F400 BB/  
PULPROG zgpg30  
TD 65536  
SOLVENT CDCl3  
NS 512  
DS 4  
SWH 24038.461 Hz  
FIDRES 0.366798 Hz  
AQ 1.3631488 sec  
RG 156.91  
RW 20.500 usec  
DE 6.50 usec  
TE 301.2 K  
D1 2.00000000 sec  
D11 0.03000000 sec  
TDO 1

===== CHANNEL f1 =====  
NUC1 13C  
P1 9.80 usec  
PLW1 58.00000000 W  
SFO1 100.6250182 MHz

===== CHANNEL f2 =====  
CPDPRG2 waltz16  
NUC2 1H  
PCPD2 90.00 usec  
PLW2 14.00000000 W  
PLW12 0.35097000 W  
PLW13 0.28428999 W  
SFO2 400.2596010 MHz

F2 - Processing parameters  
SI 32768  
SF 100.6450574 MHz  
WDW EM  
SSB 0  
LB 1.00 Hz  
GB 0  
PC 1.40

Figure S2-  $^{13}\text{C}$  NMR of ligand **3a**

## 1) TOTAL ION CHROMATOGRAMS (TIC) of ligand **3a**

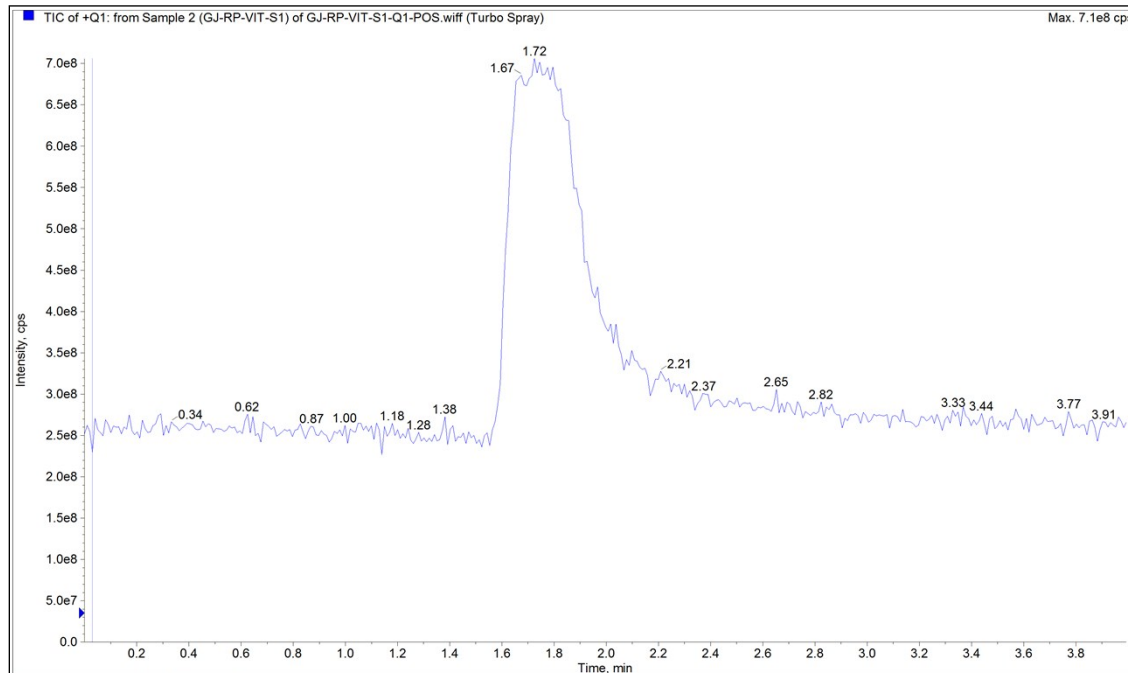

## 2) MOLECULAR ION (Q1) FOR 213

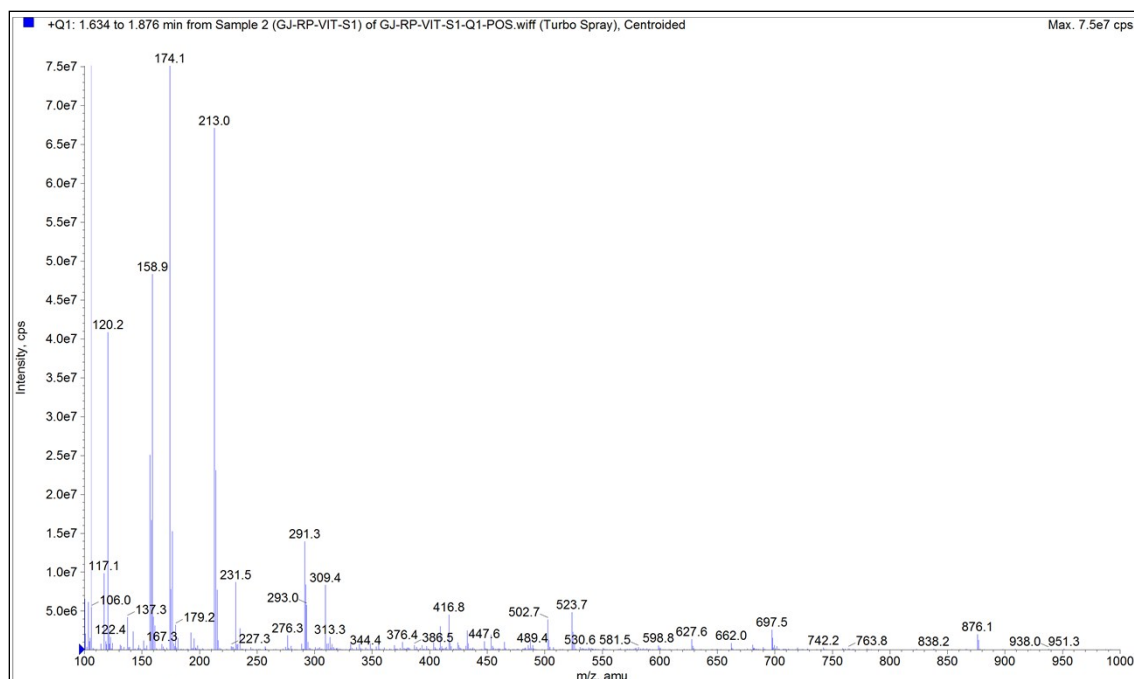

Figure S3- MS data for compound **3a**

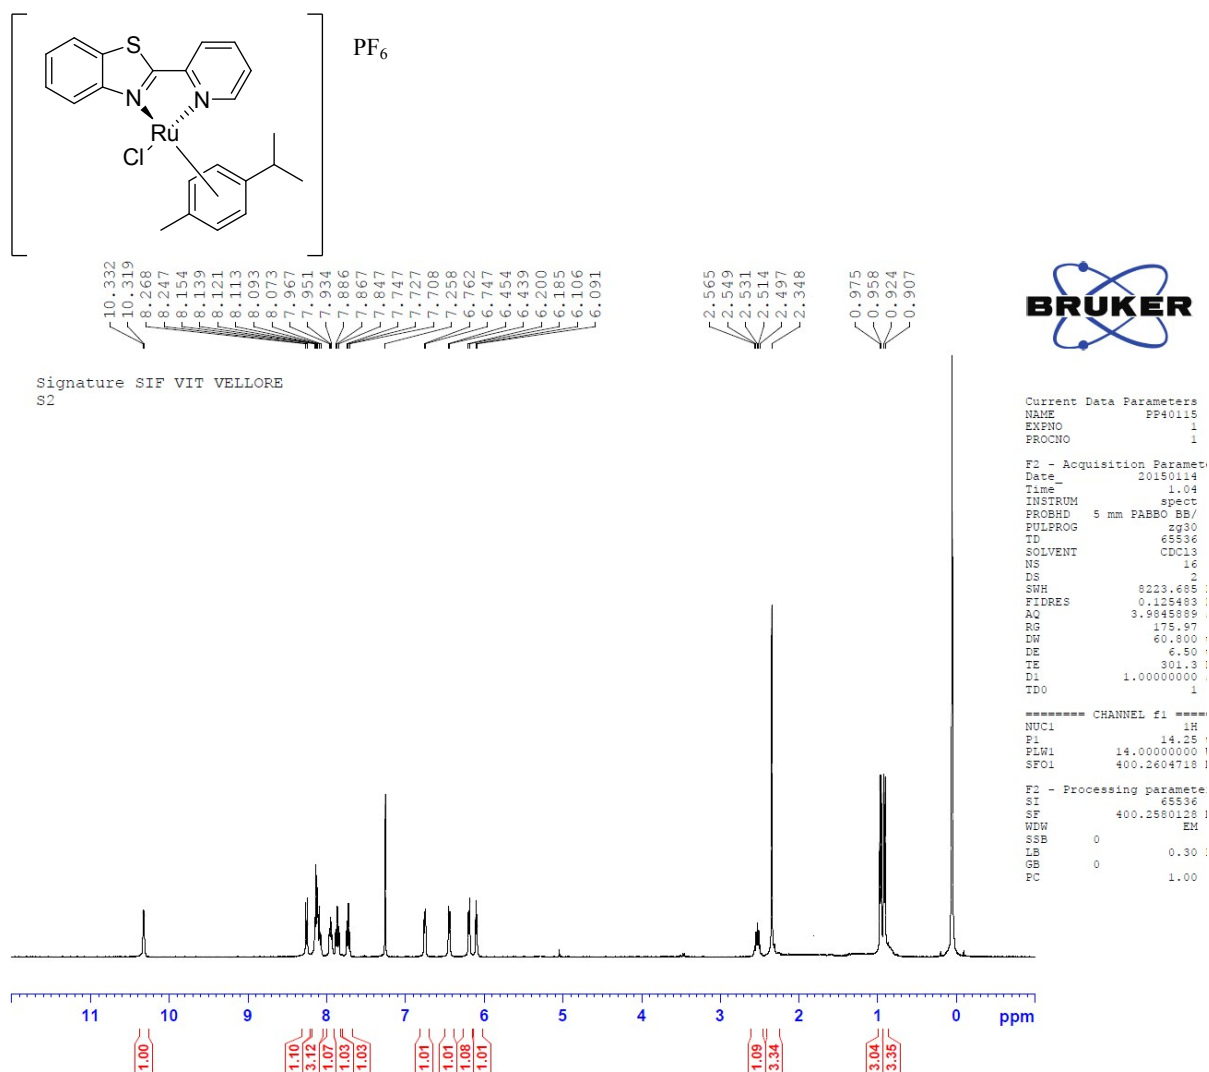

Figure S4- <sup>1</sup>H NMR of complex 4a

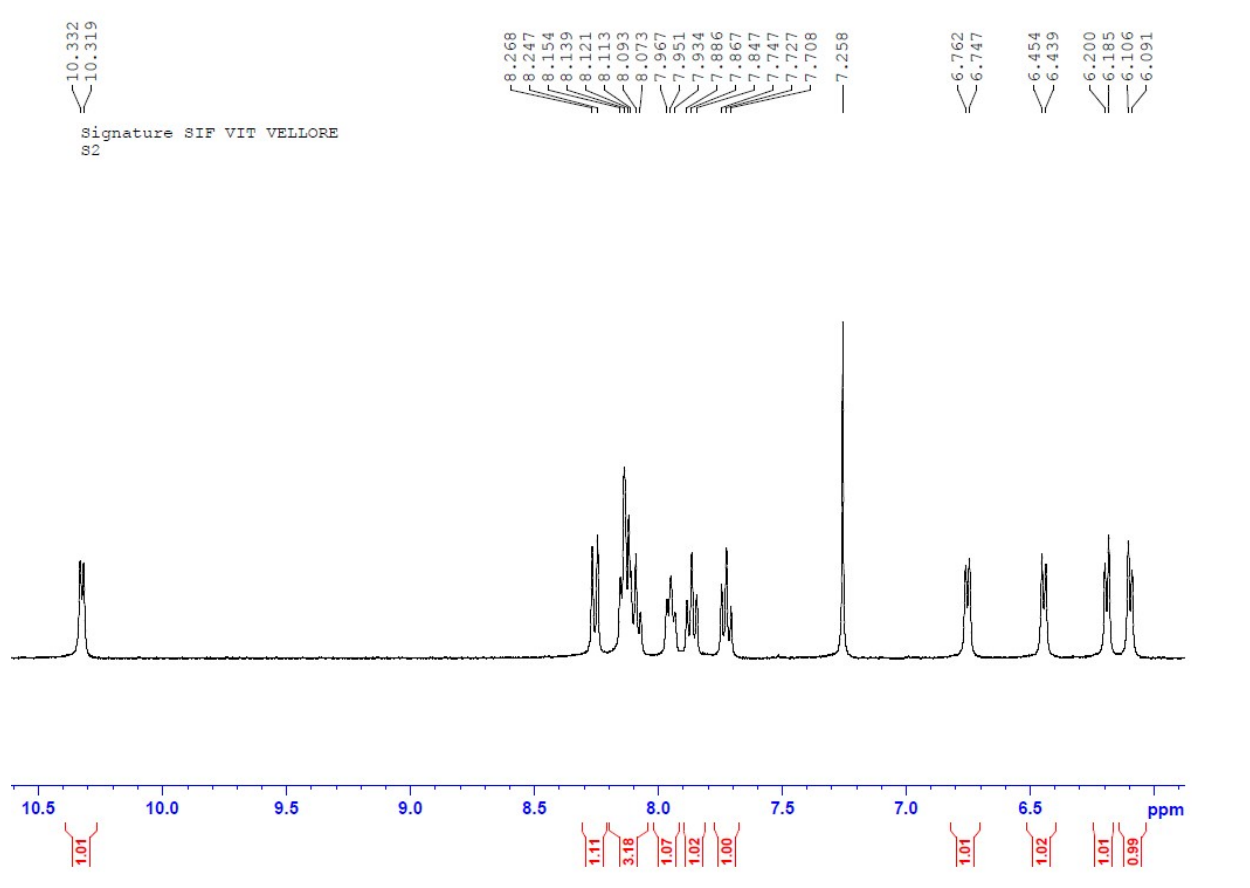

**Figure S5-**  $^1\text{H}$  NMR of complex **4a** (Expansion)

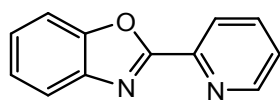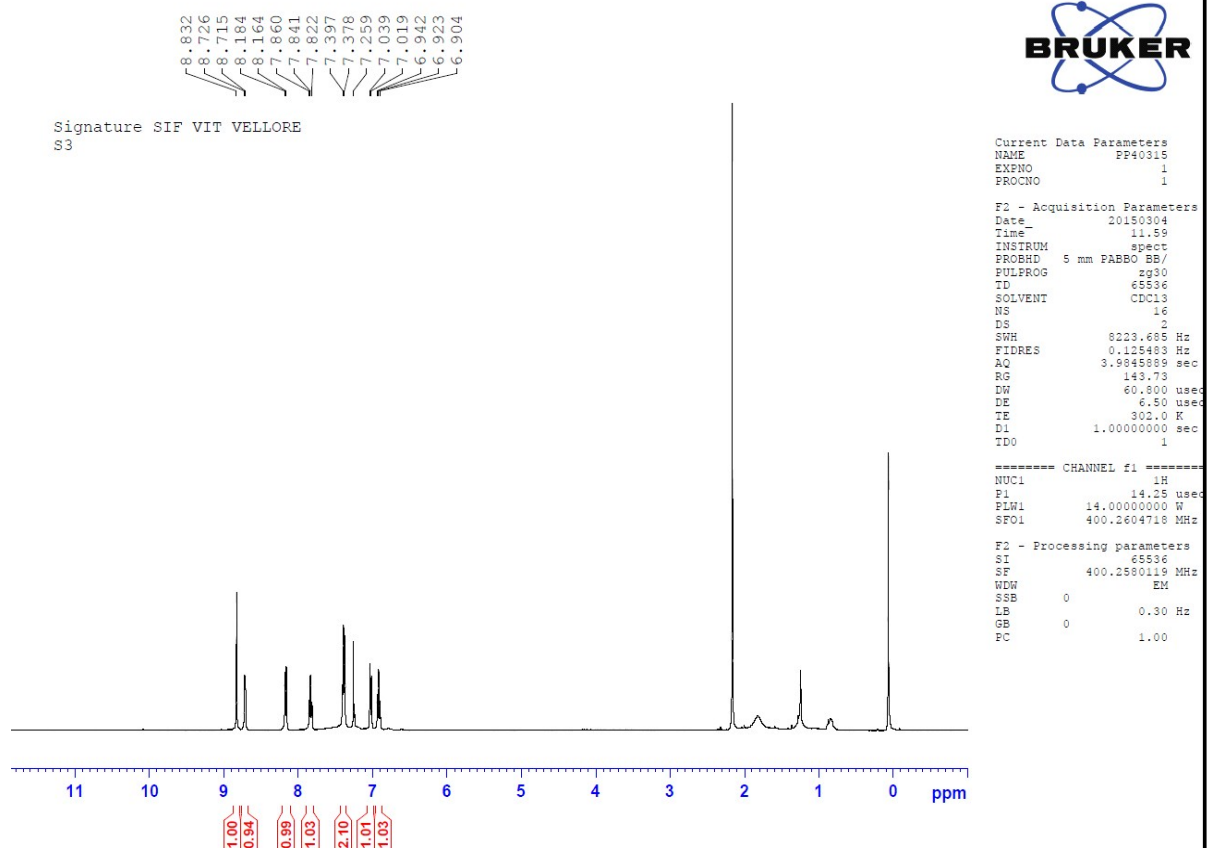

Figure S6-  $^1\text{H}$  NMR of ligand **3b**

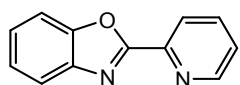

Signature SIF VIT VELLORE  
S3

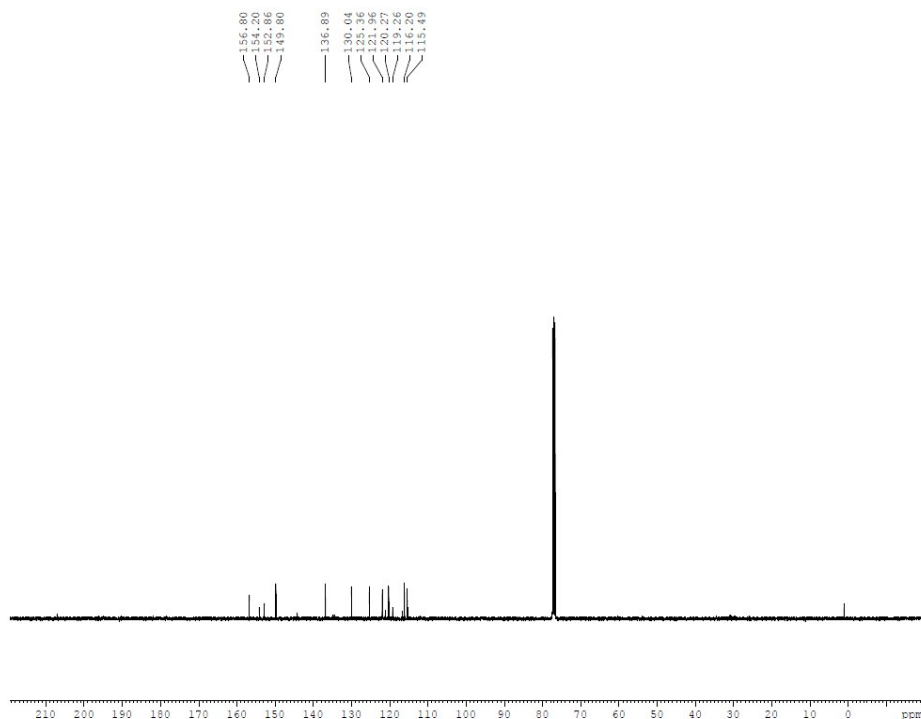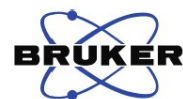

```
Current Data Parameters
NAME      PF40315
EXPNO     2
PROCNO    1

F2 - Acquisition Parameters
Date_     20150304
Time      13.14
INSTRUM    spect
PROBHD     5 mm PABBO BB/
PULPROG    zgpg30
TD         65536
SOLVENT    CDCl3
NS         512
DS         4
SWH         24038.461 Hz
FIDRES     0.366798 Hz
AQ         1.3631488 sec
RG         156.91
DW         20.800 ns
DE         6.50 ns
TE         302.8 K
D1         2.00000000 sec
D11        0.03000000 sec
TD0        1

===== CHANNEL f1 =====
NUC1       13C
P1         9.80 ns
PLW1       58.00000000 W
SFO1       100.6250182 MHz

===== CHANNEL f2 =====
CPDPRG12   waltz16
NUC2       1H
PCPD2      90.00 ns
PLW2       14.00000000 W
PLW12      0.35097000 W
PLW13      0.28428999 W
SFO2       400.2556010 MHz

F2 - Processing parameters
SI         32768
SF         100.6449540 MHz
WDW        EM
SSB        0
LB         1.00 Hz
GB         0
PC         1.40
```

**Figure S7-**  $^{13}\text{C}$  NMR of ligand **3b**



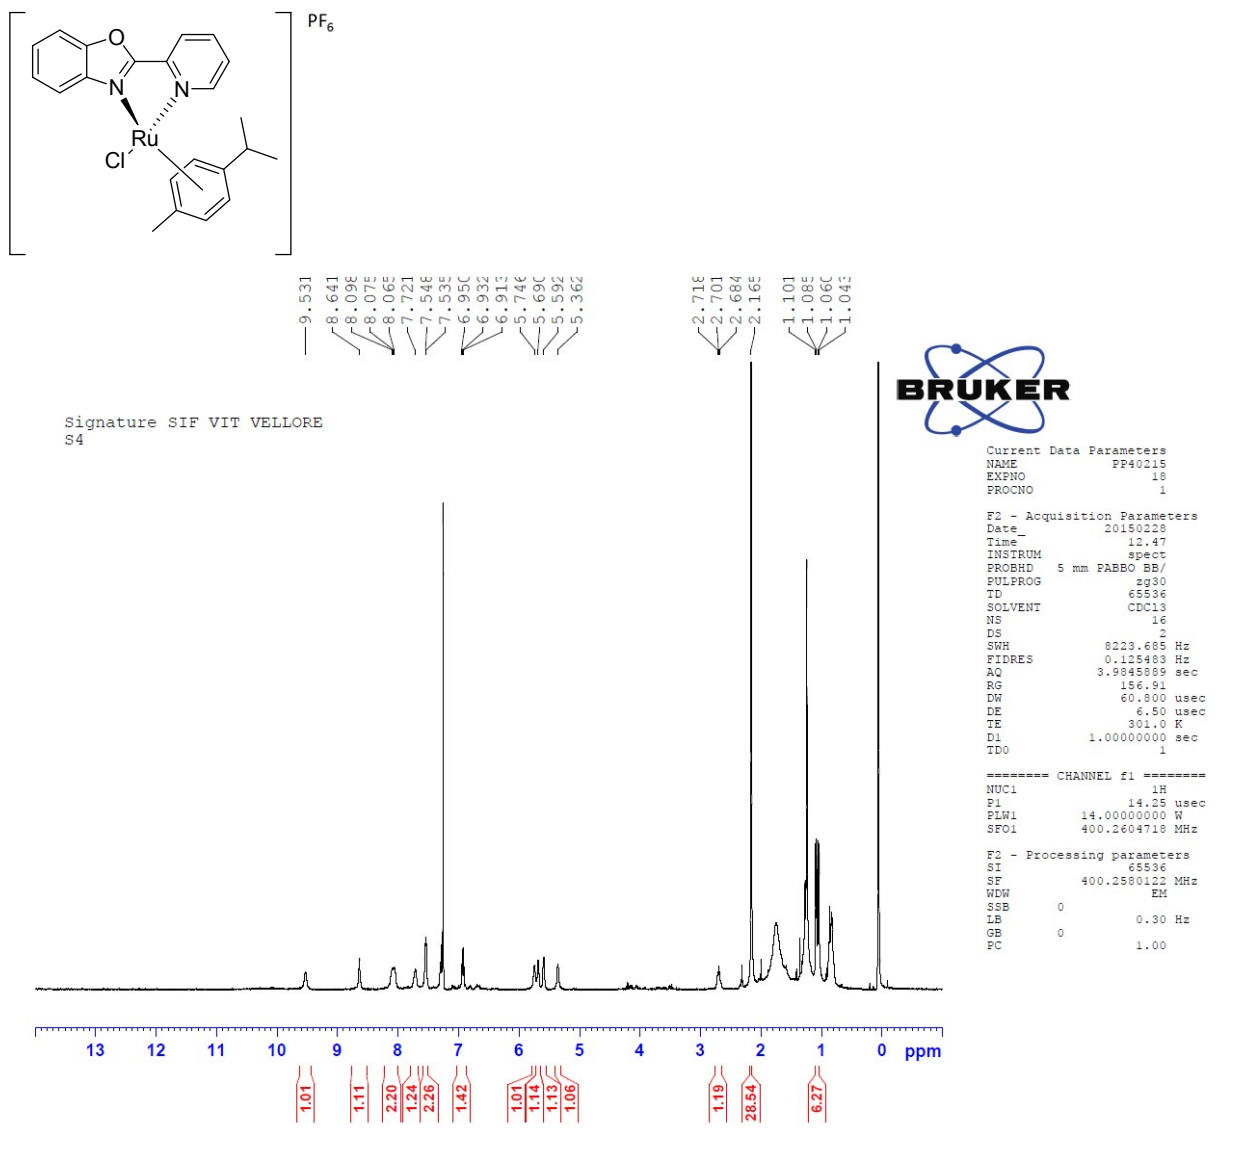

**Figure S8-  $^1\text{H}$  NMR of complex **4b****

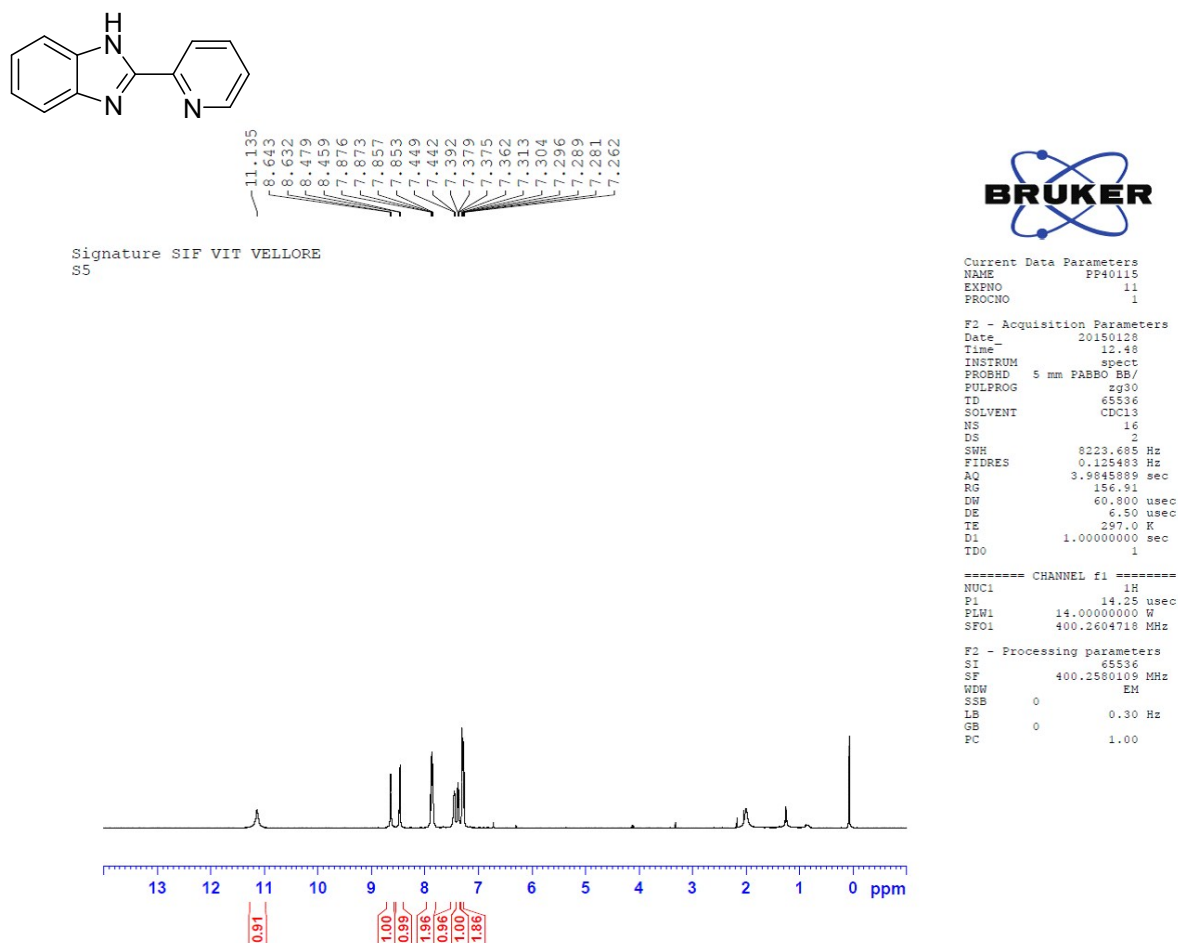

Figure S9- <sup>1</sup>H NMR of ligand 3c

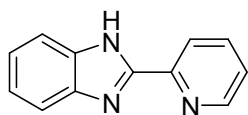

Signature SIF VIT VELLORE  
S5

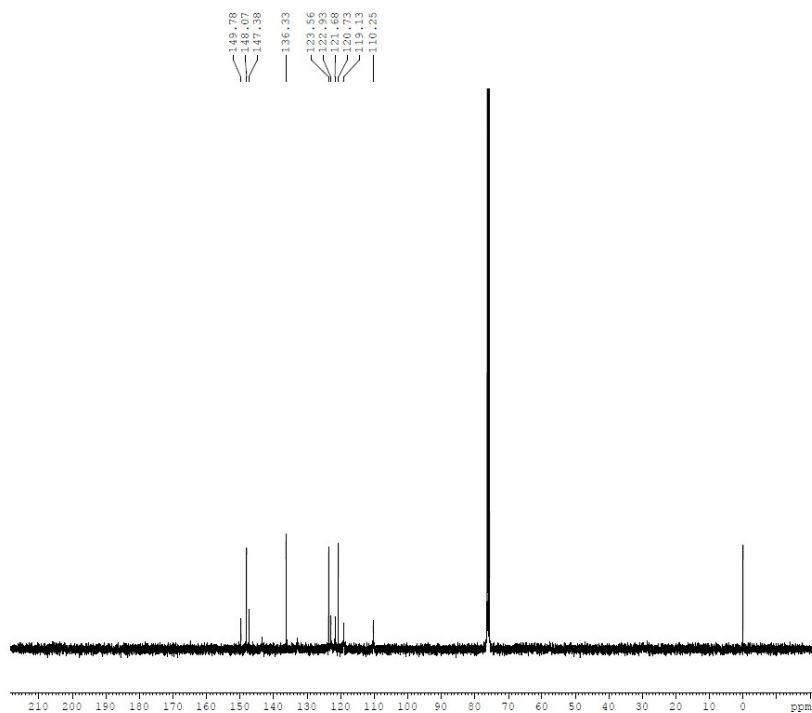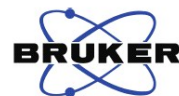

Current Data Parameters  
NAME PP40115  
EXPNO 13  
PROCNO 1

F2 - Acquisition Parameters  
Date\_ 20150130  
Time 4.31  
INSTRUM spect  
PROBHD 5 mm PABBO BB/  
PULPROG zgpg30  
TD 65536  
SOLVENT CDCl3  
NS 512  
DS 4  
SWH 24038.461 Hz  
FIDRES 0.366798 Hz  
AQ 1.3631488 sec  
RG 156.91  
DW 20.800 usec  
DE 6.50 usec  
TE 302.2 K  
D11 2.00000000 sec  
D11 0.03000000 sec  
TD0 1

===== CHANNEL f1 =====  
NUC1 13C  
P1 9.80 usec  
PLW1 58.00000000 W  
SFO1 100.6550182 MHz

===== CHANNEL f2 =====  
CPDPRG[2] waltz16  
NUC2 1H  
PCPD2 80.00 usec  
PLW2 14.00000000 W  
PLW12 0.35097000 W  
PLW13 0.28428999 W  
SFO2 400.2596010 MHz

F2 - Processing parameters  
SI 32768  
SF 100.6450560 MHz  
WDW EM  
SSB 0  
LB 1.00 Hz  
GB 0  
PC 1.40

Figure S10-  $^{13}\text{C}$  NMR of ligand 3c

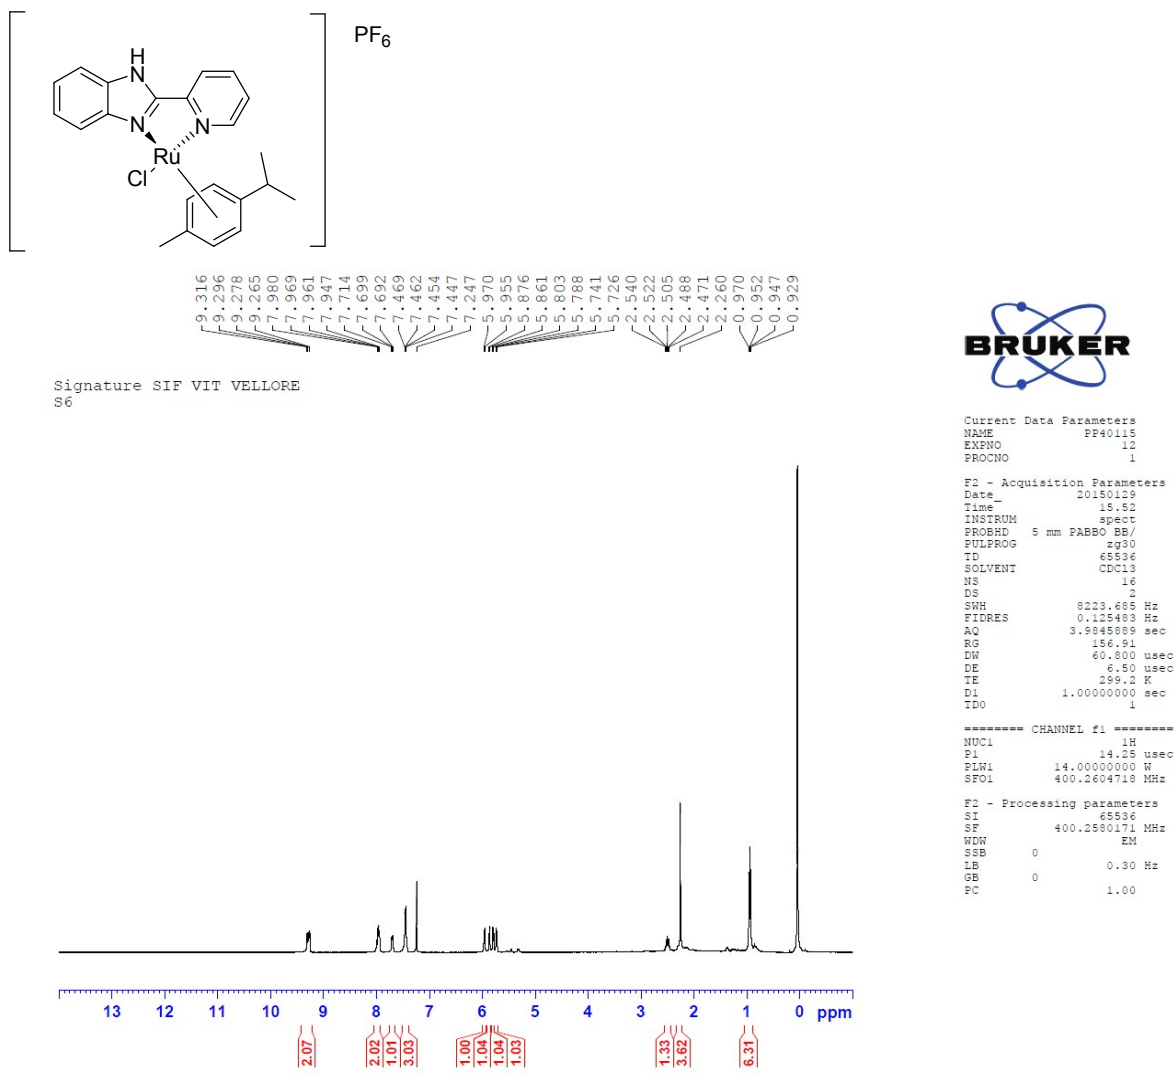

**Figure S11-  $^1\text{H}$  NMR of complex 4c**

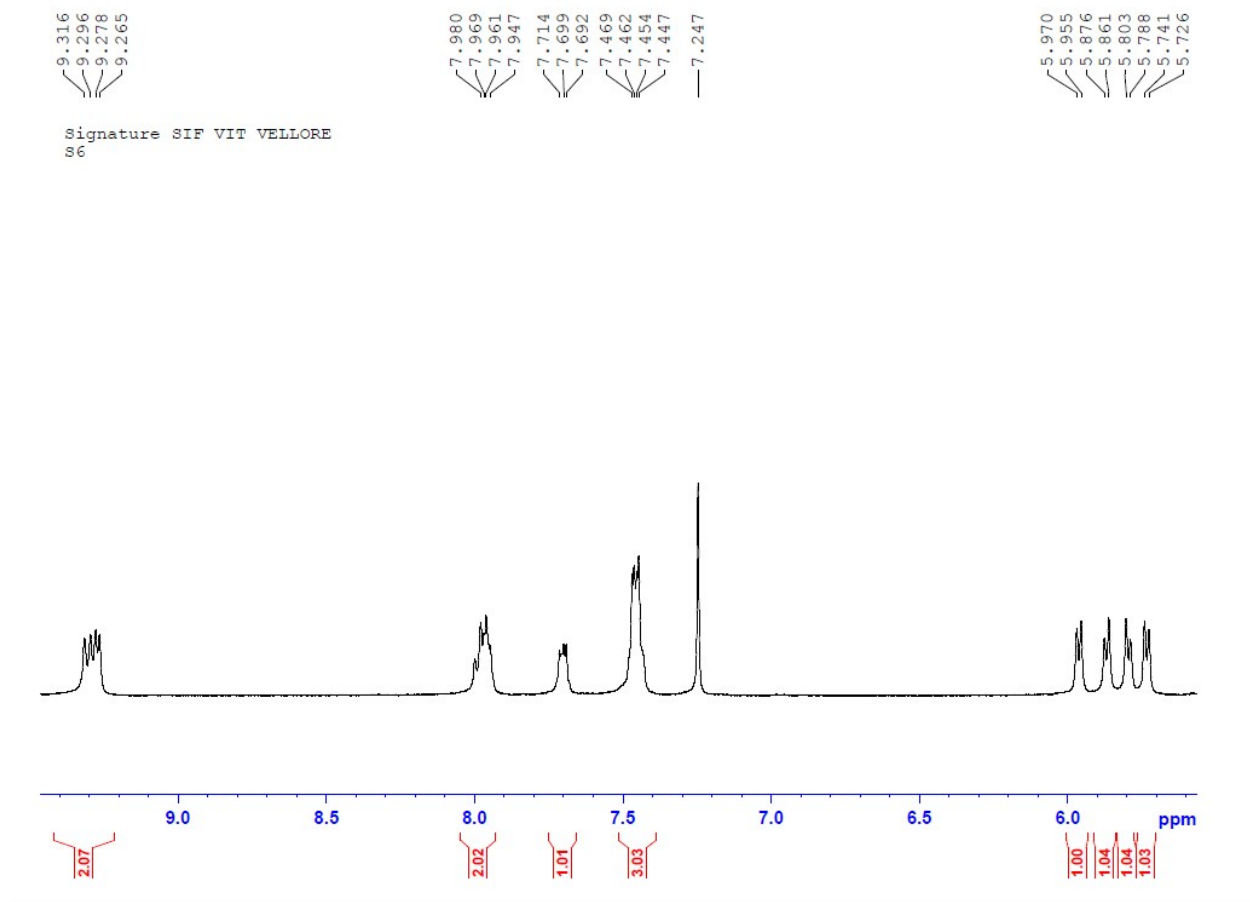

**Figure S12-**  $^1\text{H}$  NMR of complex **4c** (Expansion)

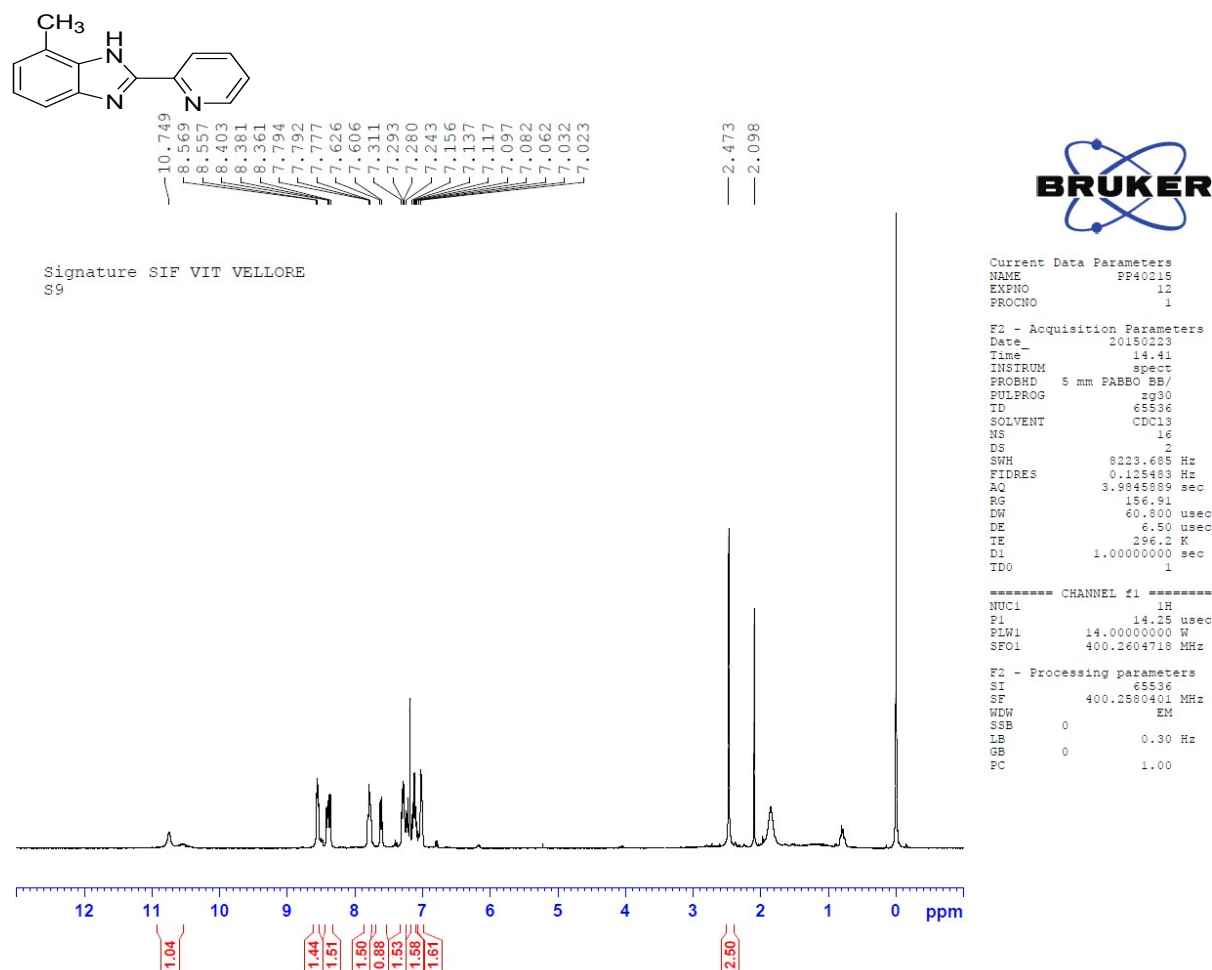

Figure S13- <sup>1</sup>H NMR of ligand **3d**

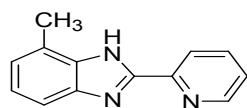

Signature SIF VIT VELLORE  
S9

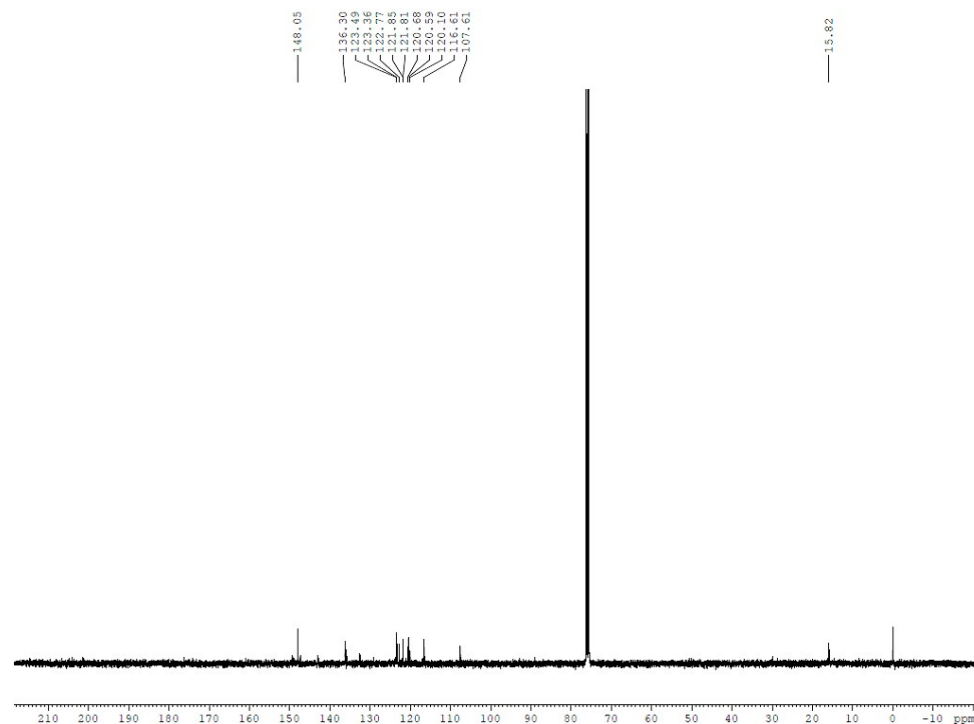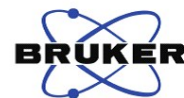

Current Data Parameters  
NAME PF40215  
EXPNO 13  
PROCNO 1

F2 - Acquisition Parameters  
Date\_ 20150223  
Time\_ 15.11  
INSTRUM spect  
PROBHD 5 mm PABBO BB/  
PULPROG zgpg30  
TD 65536  
SOLVENT CDCl3  
NS 512  
DS 4  
SWH 24038.461 Hz  
FIDRES 0.366798 Hz  
AQ 1.3631498 sec  
RG 143.73  
DW 20.800 usec  
DE 6.50 usec  
TE 297.2 K  
D1 2.00000000 sec  
D11 0.03000000 sec  
TD0 1

===== CHANNEL f1 =====  
NUC1 13C  
P1 9.80 usec  
PLW1 58.00000000 W  
SFO1 100.6550182 MHz

===== CHANNEL f2 =====  
CPDPRG2 waltz16  
NUC2 1H  
PCPD2 90.00 usec  
PLW2 14.00000000 W  
PLW12 0.35097000 W  
PLW13 0.28428999 W  
SFO2 400.2596010 MHz

F2 - Processing parameters  
SI 32768  
SF 100.6450596 MHz  
WDW EM  
SSB 0  
LB 1.00 Hz  
GB 0  
PC 1.40

Figure S14- <sup>13</sup>C NMR of ligand 3d

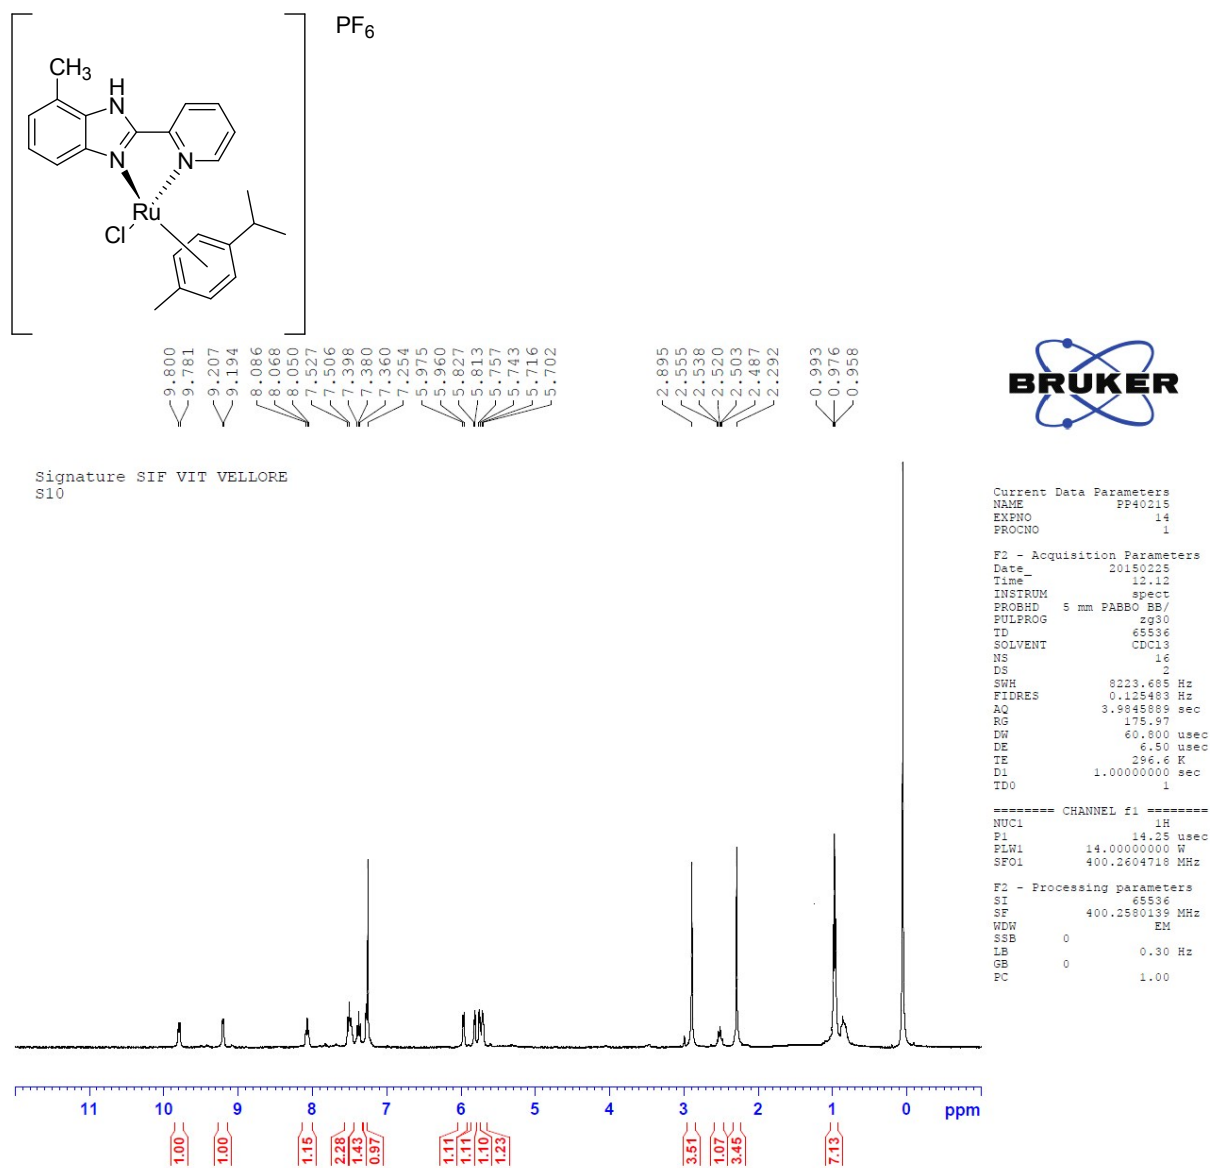

**Figure S15- <sup>1</sup>H NMR of complex 4d**



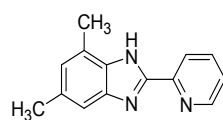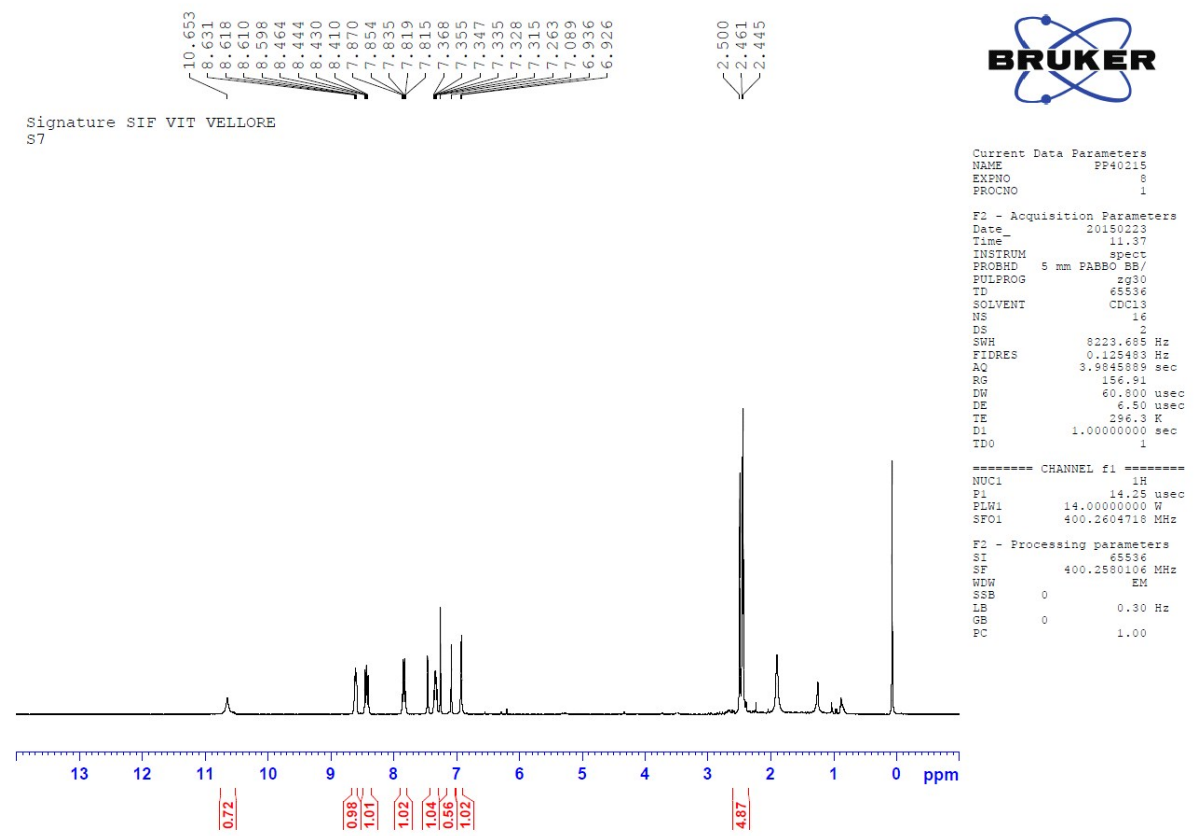

Figure S16- <sup>1</sup>H NMR of ligand 3e

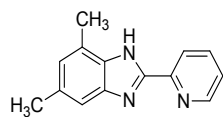

Signature SIF VIT VELLORE  
S7

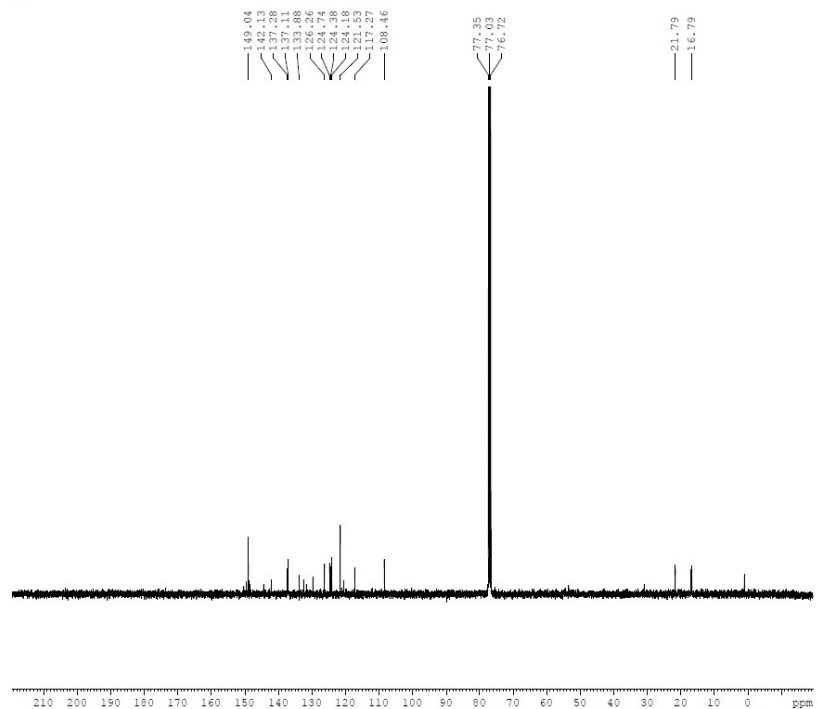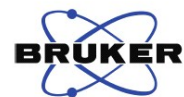

```
Current Data Parameters
NAME      PF40215
EXPNO     9
PROCNO    1

F2 - Acquisition Parameters
Date_     20150223
Time      12.19
INSTRUM   spect
PROBHD    5 mm PABBO BB/
PULPROG   zgpg30
TD         65536
SOLVENT   CDCl3
NS         512
DS         4
SWH        24038.461 Hz
FIDRES     0.366798 Hz
AQ         1.3631488 sec
RG         63.11
EW         20.800 usec
DE         6.50 usec
TE         297.3 K
D1         2.00000000 sec
D11        0.03000000 sec
TD0        1

===== CHANNEL f1 =====
NUC1       13C
P1         9.80 usec
PLW1       58.00000000 W
SFO1       100.6250182 MHz

===== CHANNEL f2 =====
CPDPRG2    waltz16
NUC2       1H
PCPD2      90.00 usec
PLW2       14.00000000 W
PLW12      0.35097000 W
PLW13      0.28428999 W
SFO2       400.2596010 MHz

F2 - Processing parameters
SI         32768
SF         100.6449540 MHz
WDW        EM
SSB        0
LB         1.00 Hz
GB         0
PC         1.40
```

Figure S17- <sup>13</sup>C NMR of ligand 3e

## TOTAL ION CHROMATOGRAMS (TIC)

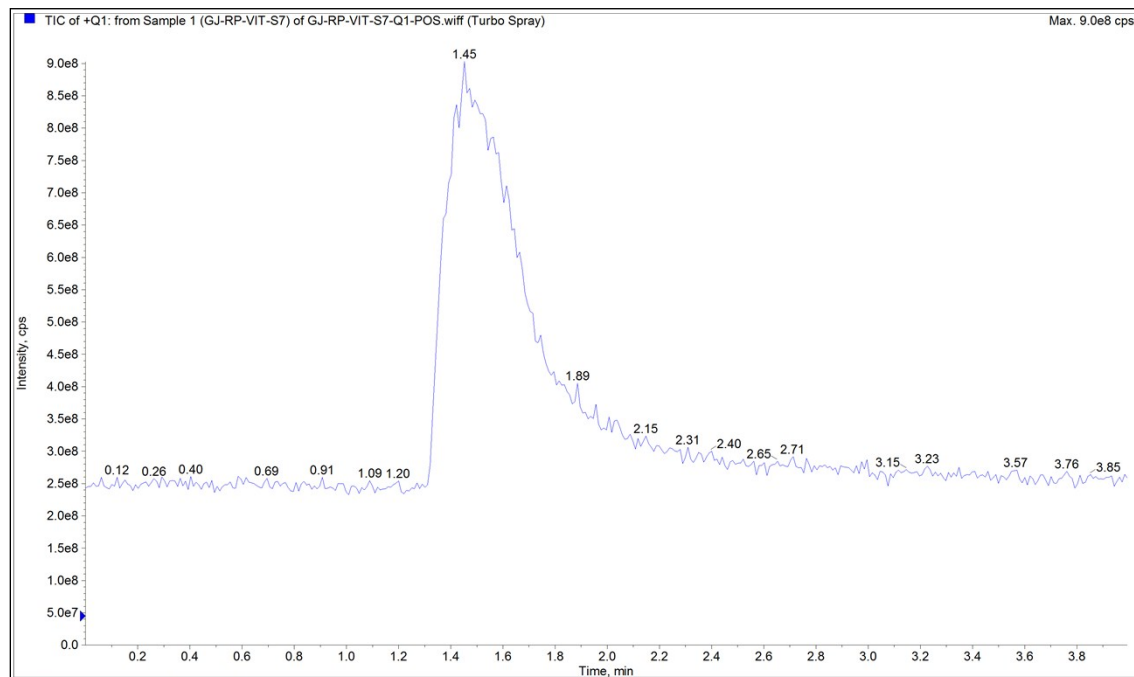

### 1) MOLECULAR ION (Q1) FOR 224

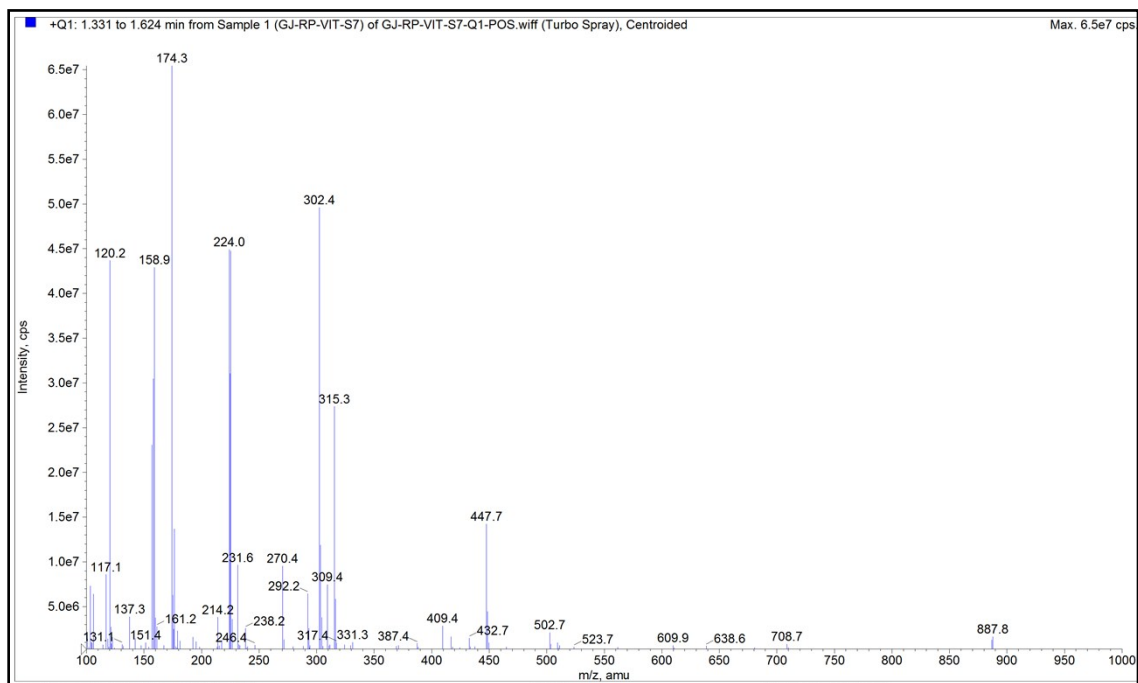

**Figure S18-** MS data for compound **3e**

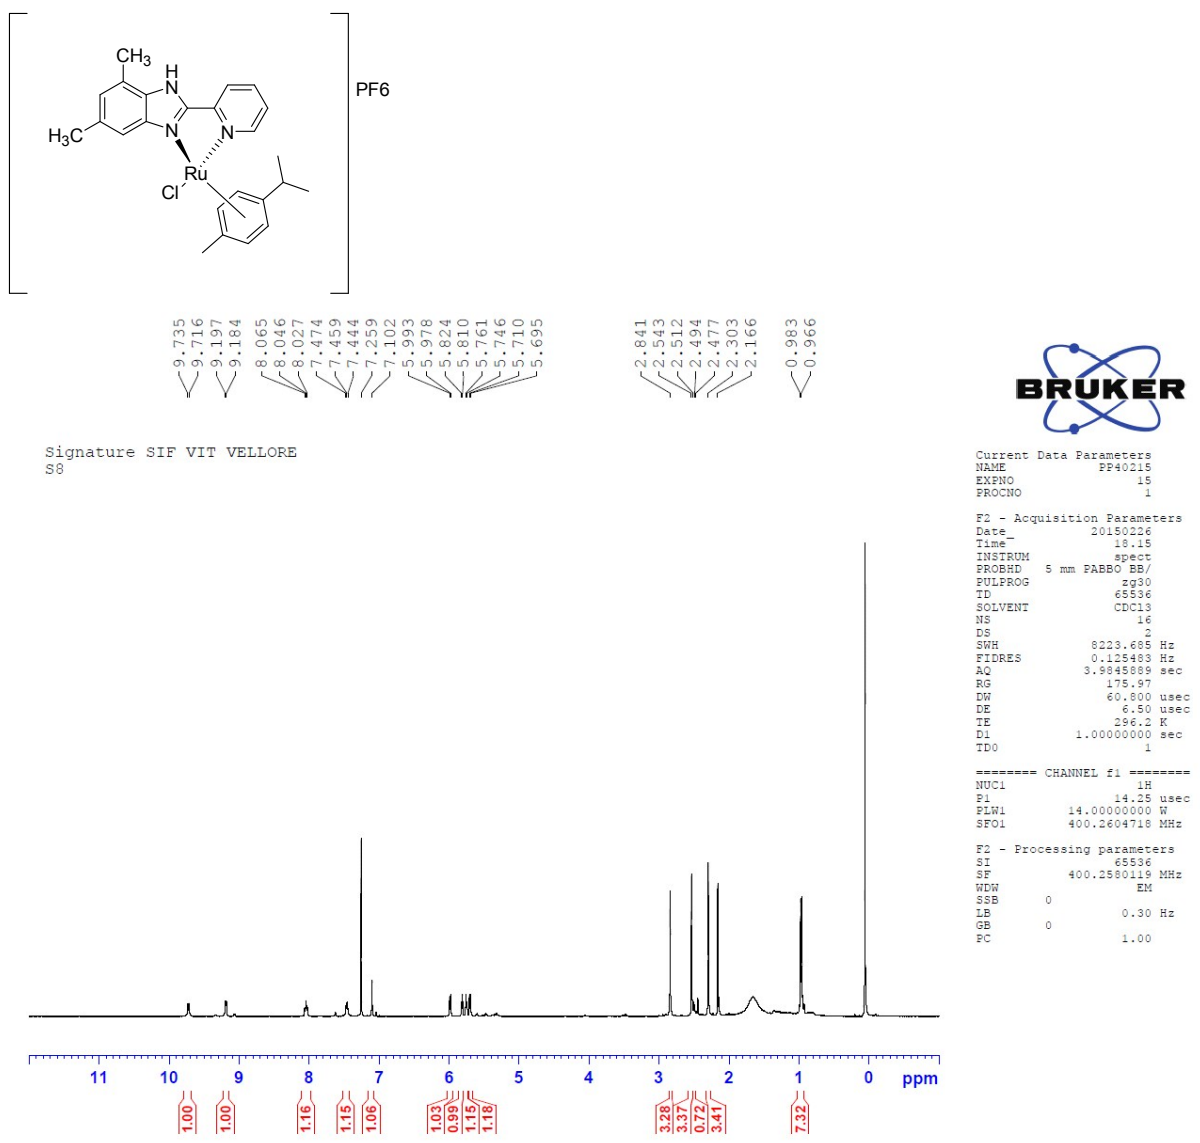

Figure S19- <sup>1</sup>H NMR of complex 4e

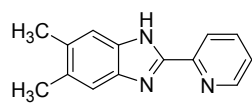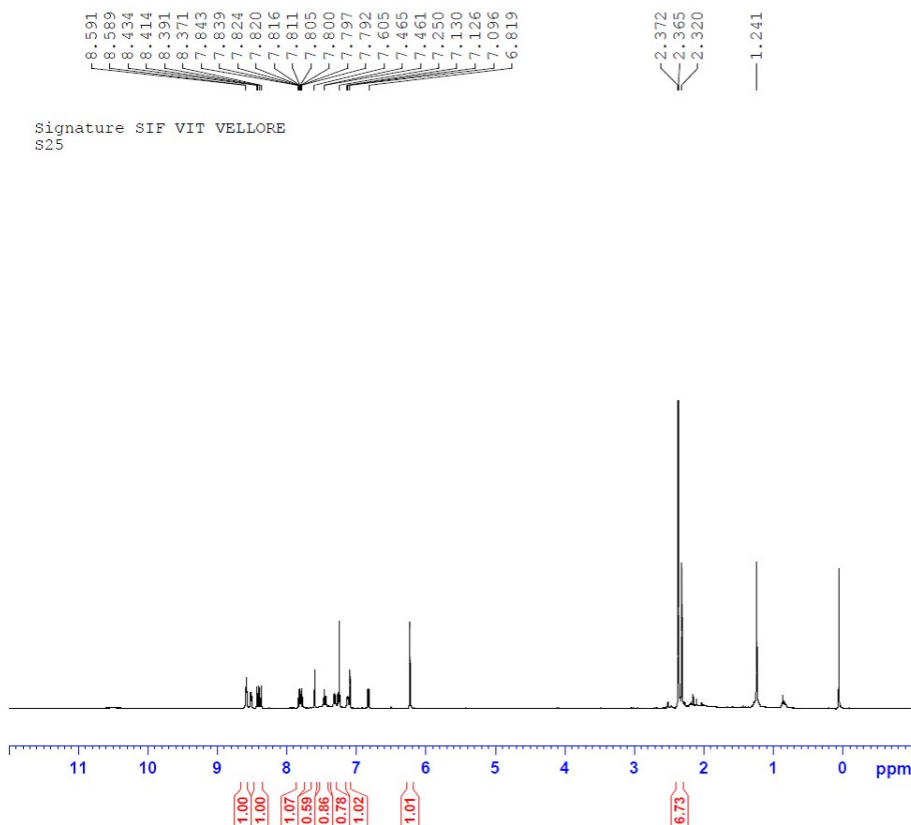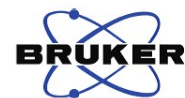

Current Data Parameters  
NAME PP40415  
EXPNO 22  
PROCNO 1

F2 - Acquisition Parameters  
Date\_ 20150417  
Time 11.49  
INSTRUM spect  
PROBHD 5 mm PABBO BB/  
PULPROG zg30  
TD 65536  
SOLVENT CDC13  
NS 16  
DS 2  
SWH 8223.685 Hz  
FIDRES 0.125483 Hz  
AQ 3.9845889 sec  
RG 156.91  
DW 60.800 usec  
DE 6.50 usec  
TE 300.3 K  
D1 1.00000000 sec  
TD0 1

===== CHANNEL f1 =====  
NUC1 1H  
P1 14.25 usec  
PLW1 14.00000000 W  
SFO1 400.2604718 MHz

F2 - Processing parameters  
SI 65536  
SF 400.2580155 MHz  
WDW EM  
SSB 0  
LB 0.30 Hz  
GB 0  
PC 1.00

Figure S20-  $^1\text{H}$  NMR of ligand **3f**

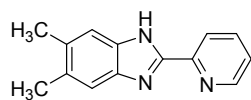

Signature SIF VIT VELLORE  
S25

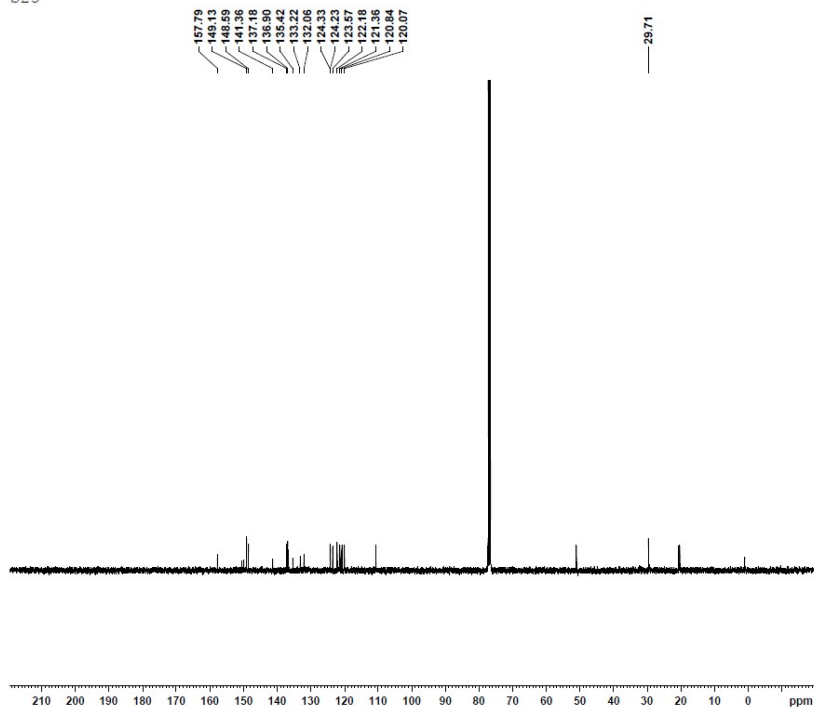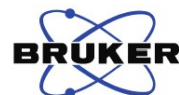

Current Data Parameters  
NAME PF40415  
EXPNO 21  
PROCNO 1

F2 - Acquisition Parameters  
Date\_ 20150416  
Time 23.24  
INSTRUM spect  
PROBHD 5 mm PABBO BB/  
PULPROG zgpg30  
TD 65536  
SOLVENT CDCl3  
NS 512  
DS 4  
SWH 24038.461 Hz  
FIDRES 0.366798 Hz  
AQ 1.3631488 sec  
RG 199.6  
DW 20.800 usec  
DE 6.50 usec  
TE 300.2 K  
D1 2.00000000 sec  
D11 0.03000000 sec  
TD0 1

===== CHANNEL f1 =====  
NUC1 13C  
P1 9.80 usec  
PLW1 58.00000000 W  
SFO1 100.6550182 MHz

===== CHANNEL f2 =====  
CPDPRG2 waltz16  
NUC2 1H  
PCPD2 90.00 usec  
PLW2 14.00000000 W  
PLW12 0.35097000 W  
PLW13 0.28428999 W  
SFO2 400.2596010 MHz

F2 - Processing parameters  
SI 32768  
SF 100.6449540 MHz  
WDW EM  
SBB 0  
LB 1.00 Hz  
GB 0  
PC 1.40

Figure S21-  $^{13}\text{C}$  NMR of ligand **3f**

## TOTAL ION CHROMATOGRAMS (TIC)

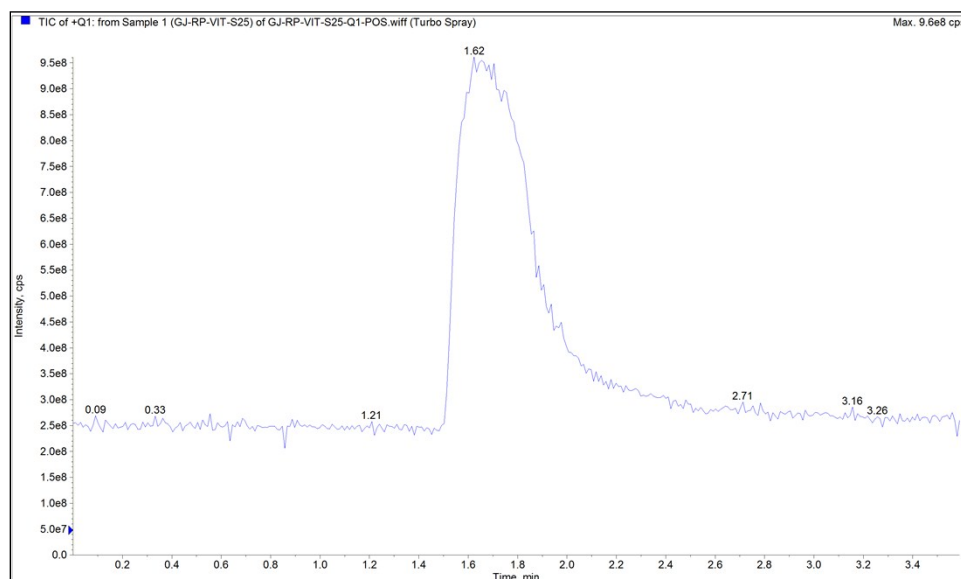

### 1) MOLECULAR ION (Q1)

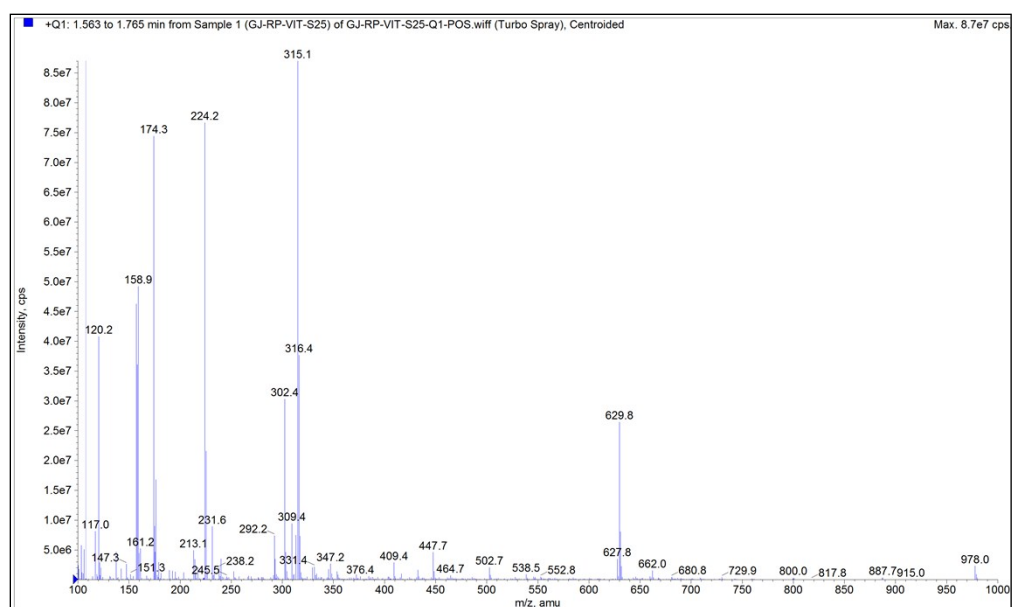

Figure S22- MS data for compound **3f**

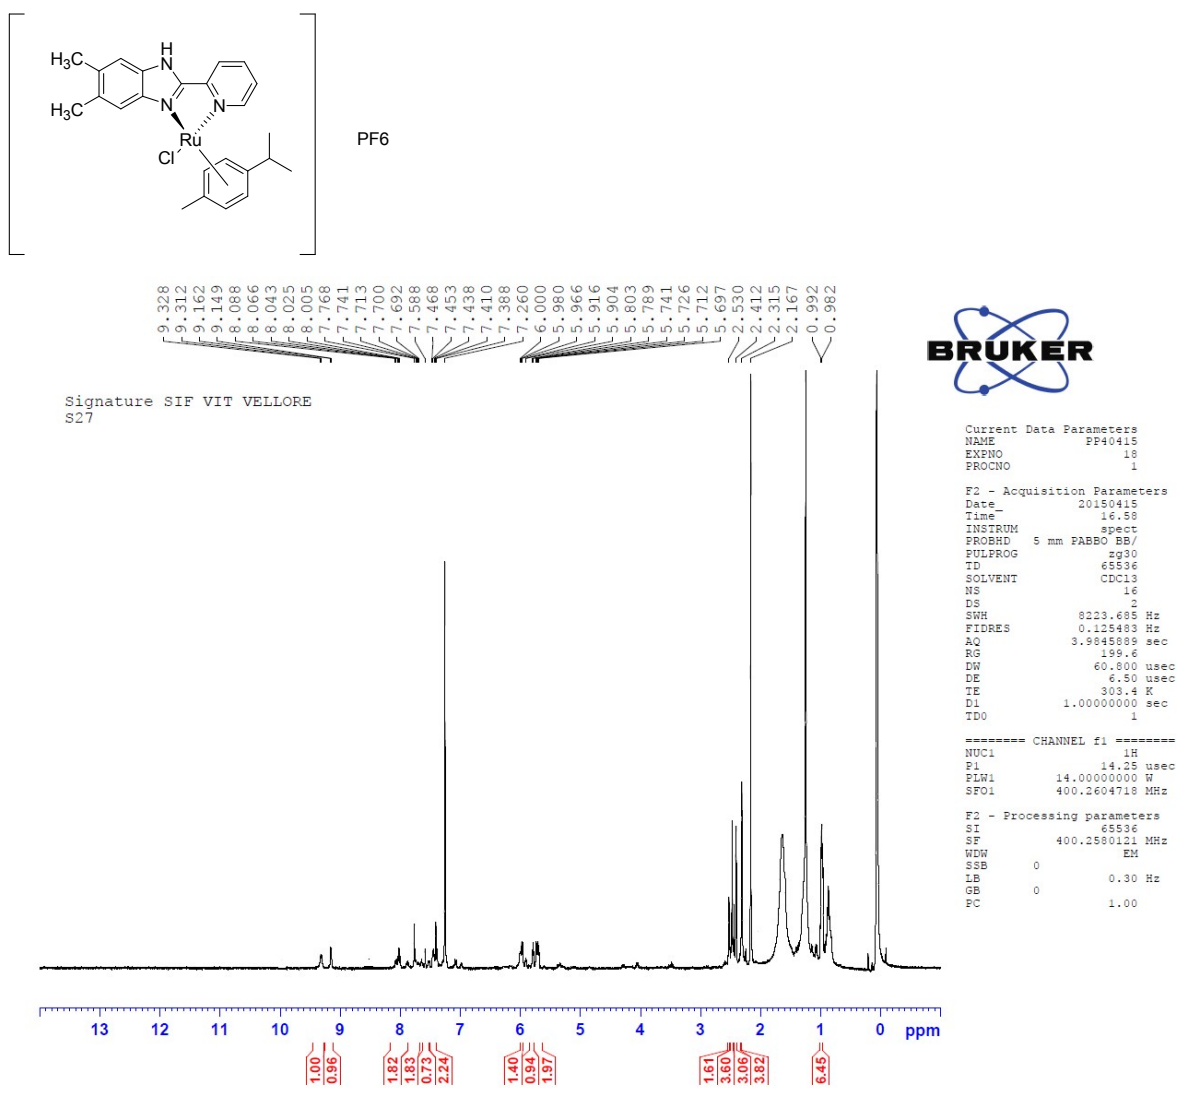

**Figure S23- <sup>1</sup>H NMR of complex 4f**



## TOTAL ION CHROMATOGRAMS (TIC)

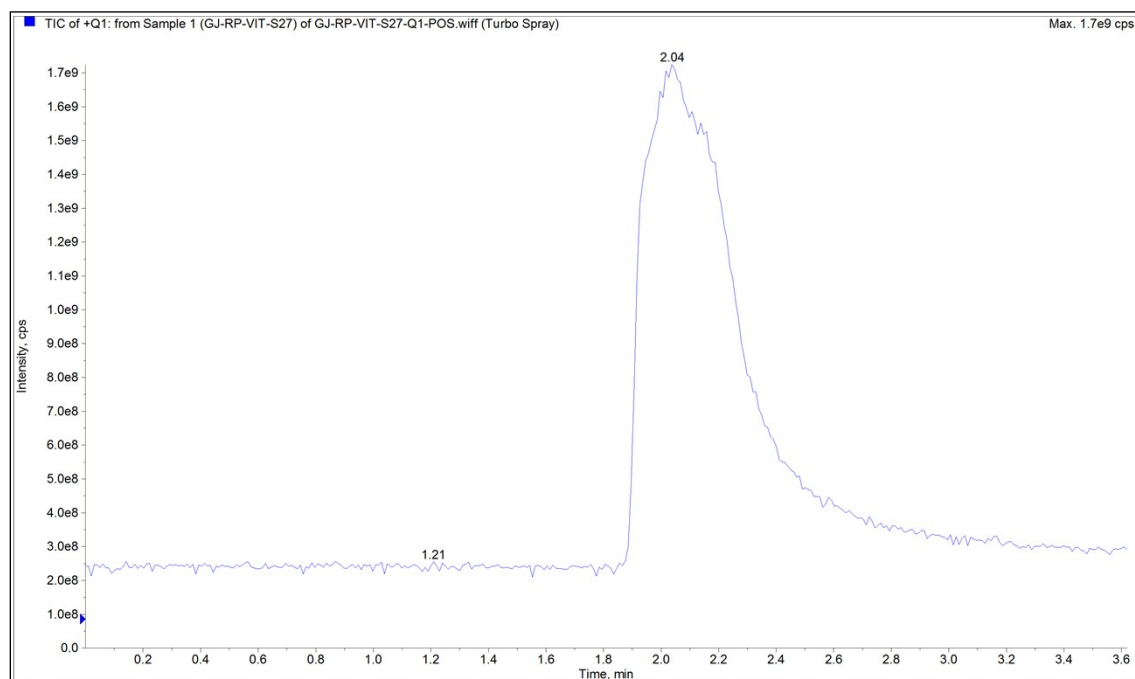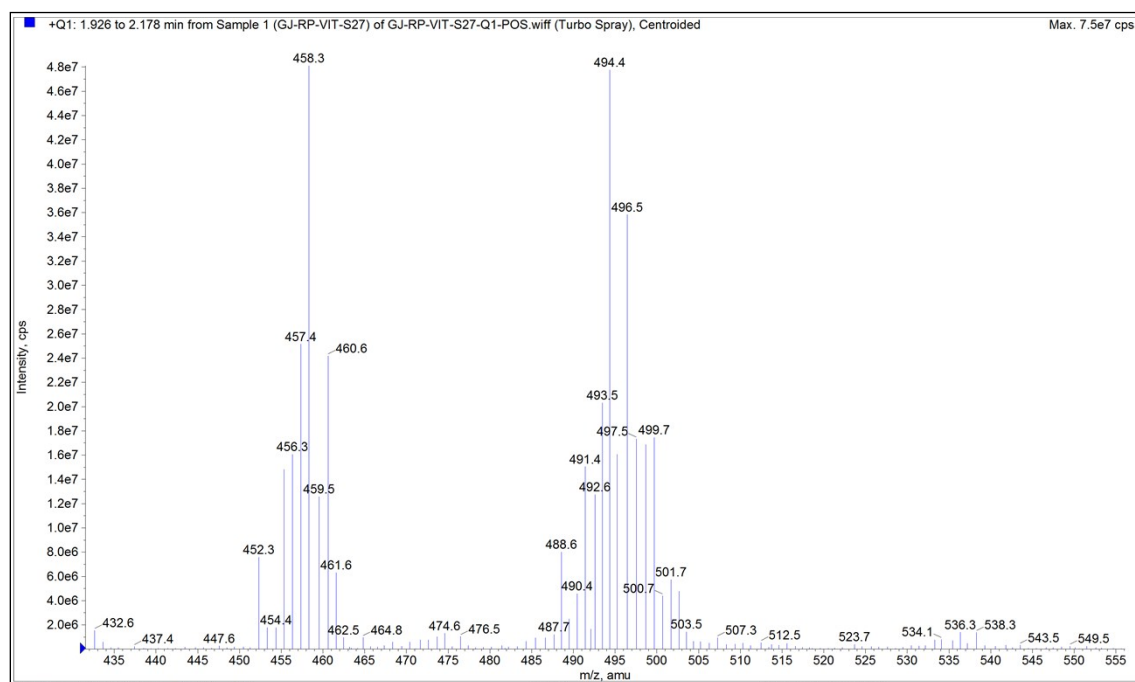

**Figure S24- MS data for compound 4f**

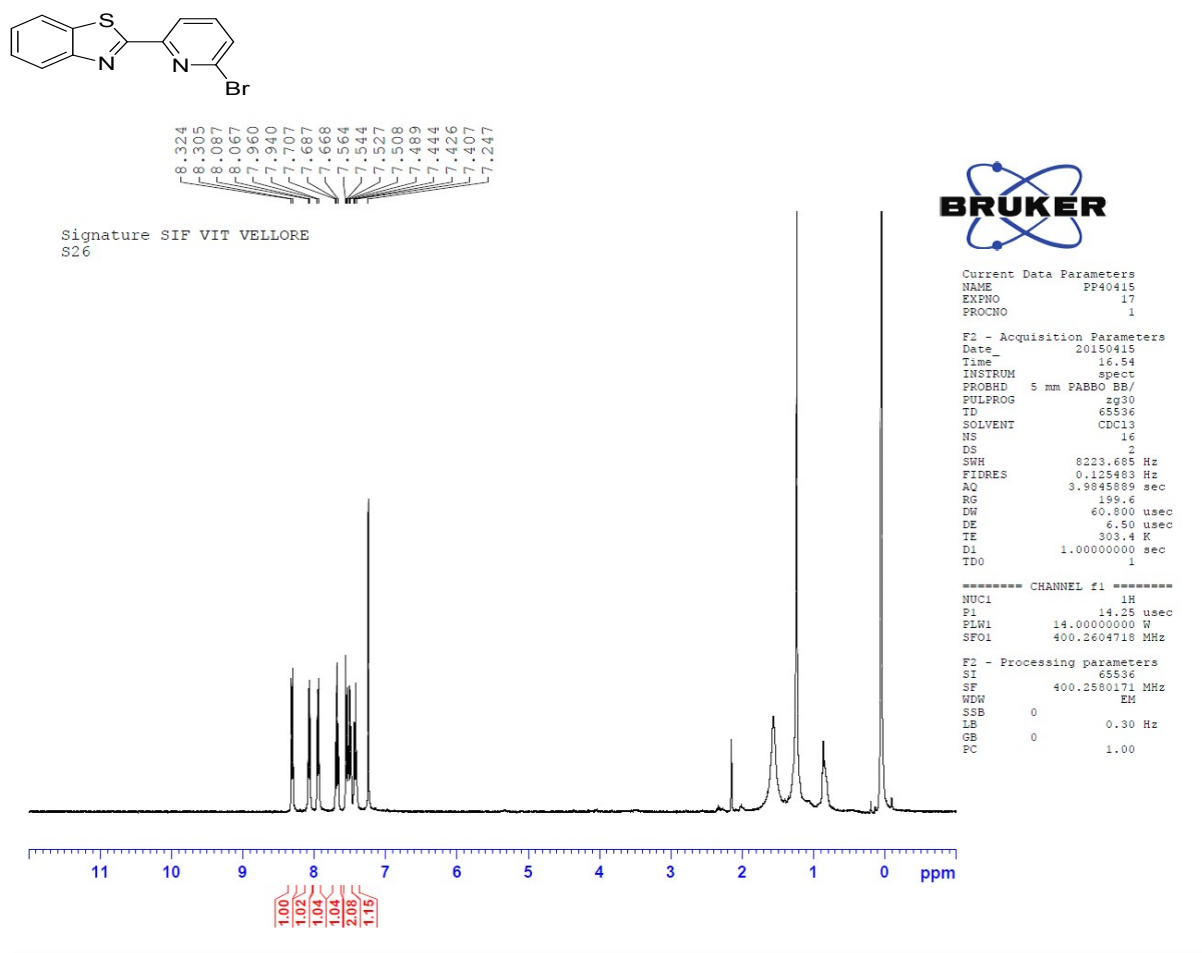

**Figure S25-**  $^1\text{H}$  NMR of ligand **3g**

## TOTAL ION CHROMATOGRAMS (TIC)

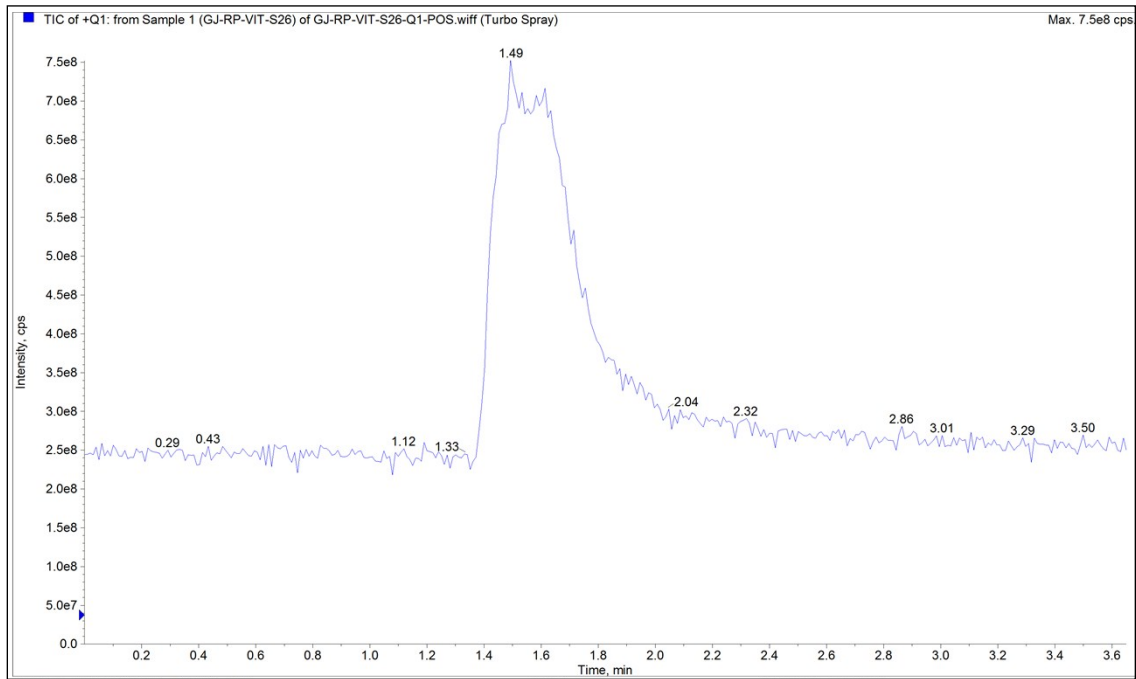

### 1) MOLECULAR ION (Q1)

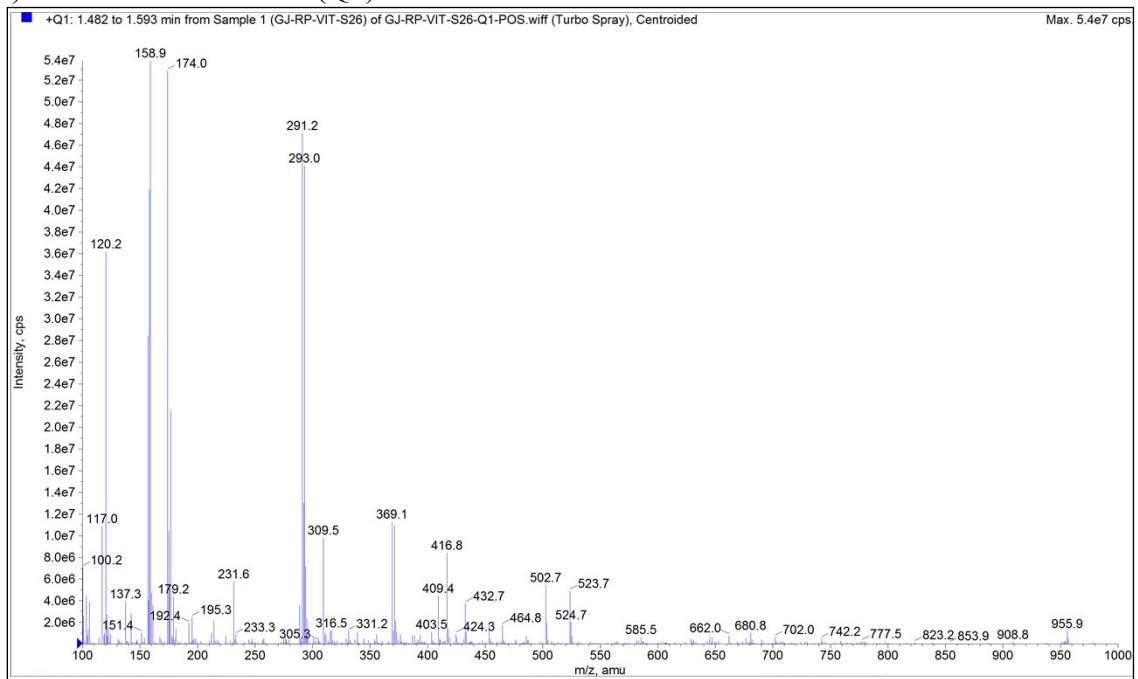

## 2) ZOOM IN VIEW

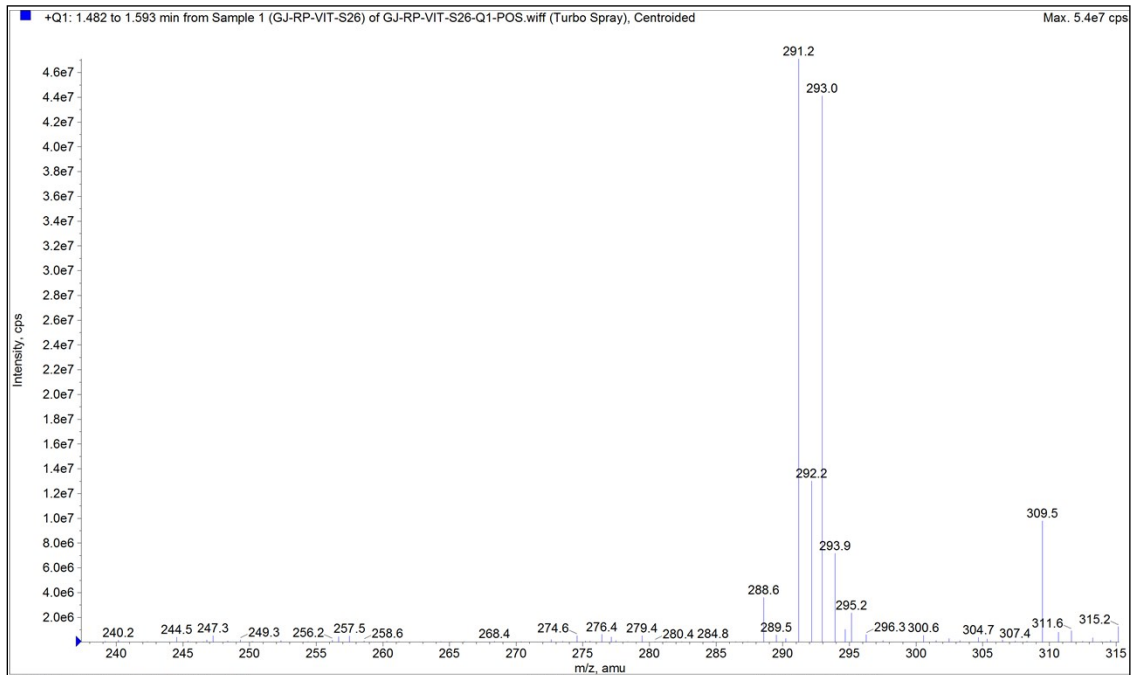

**Figure S26-** MS data for compound **3g**

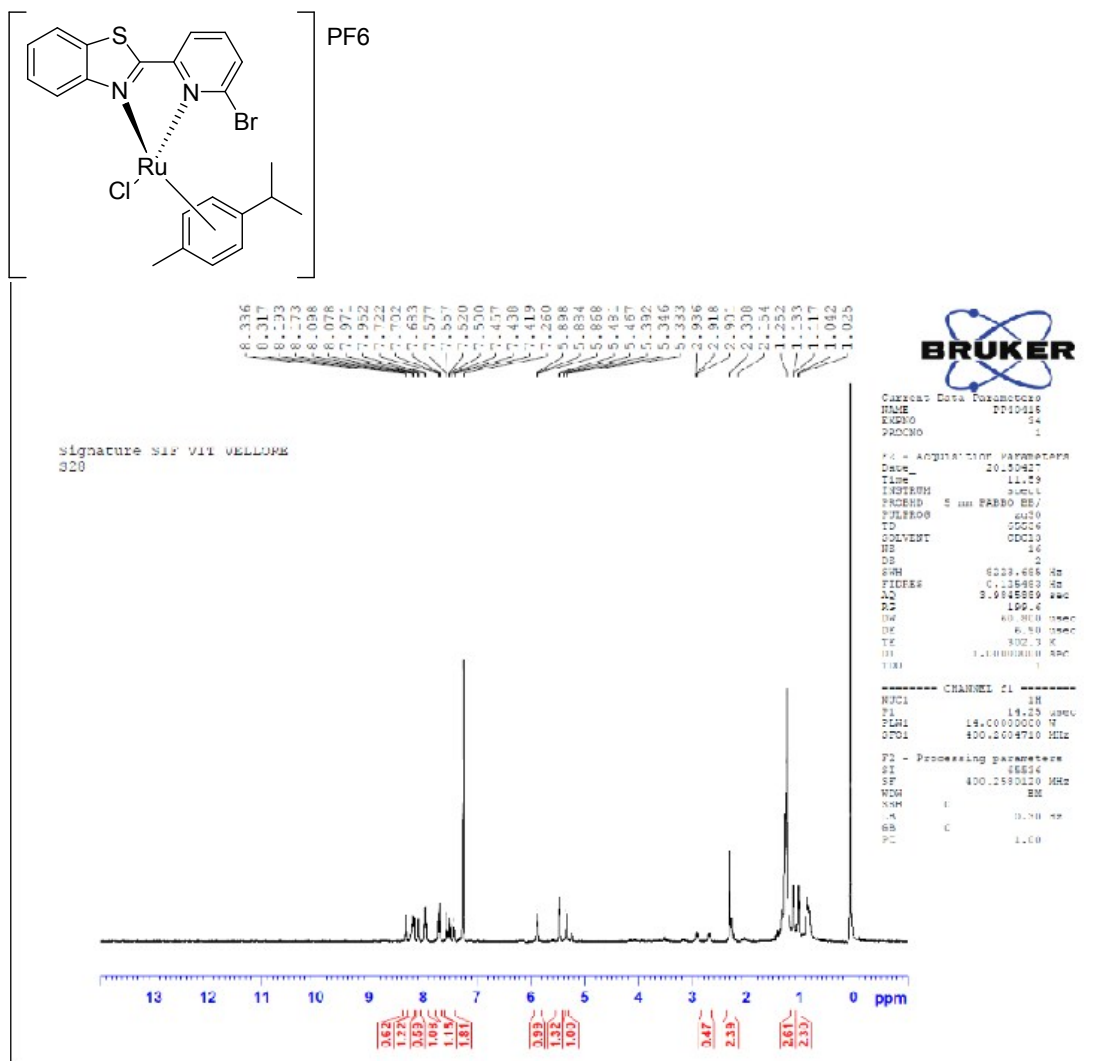

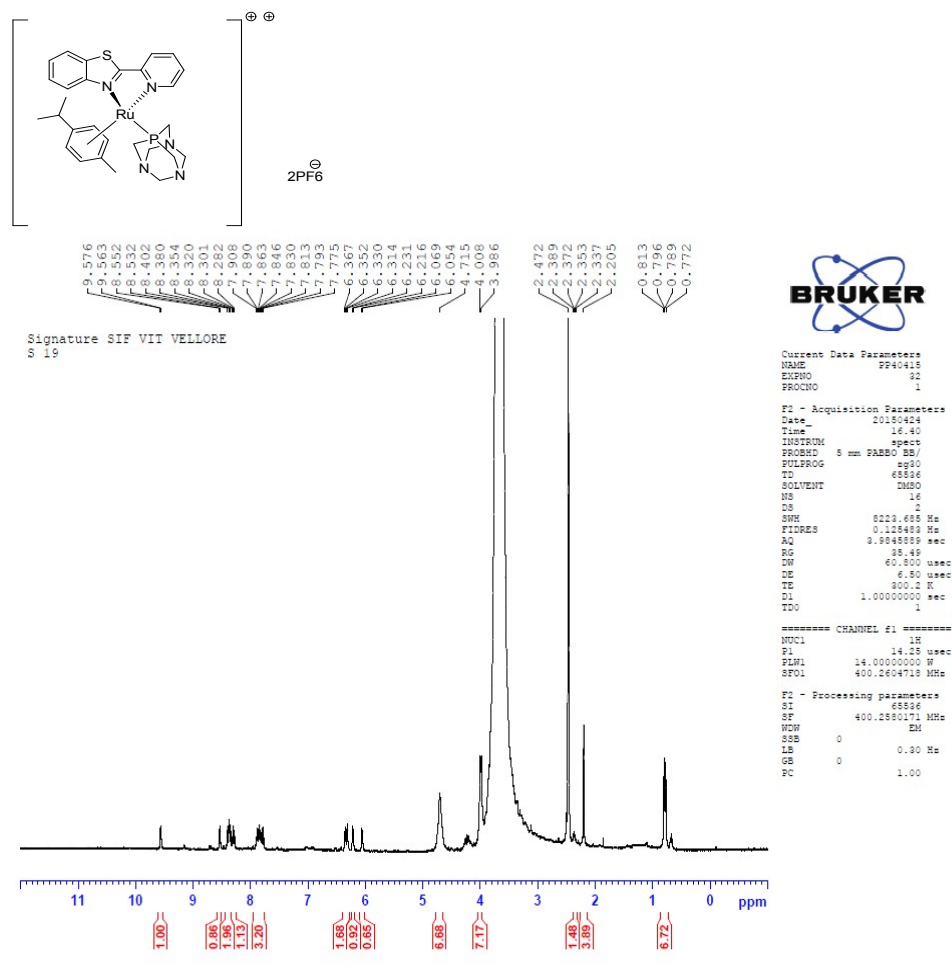

Figure S28- <sup>1</sup>H NMR of complex 5a

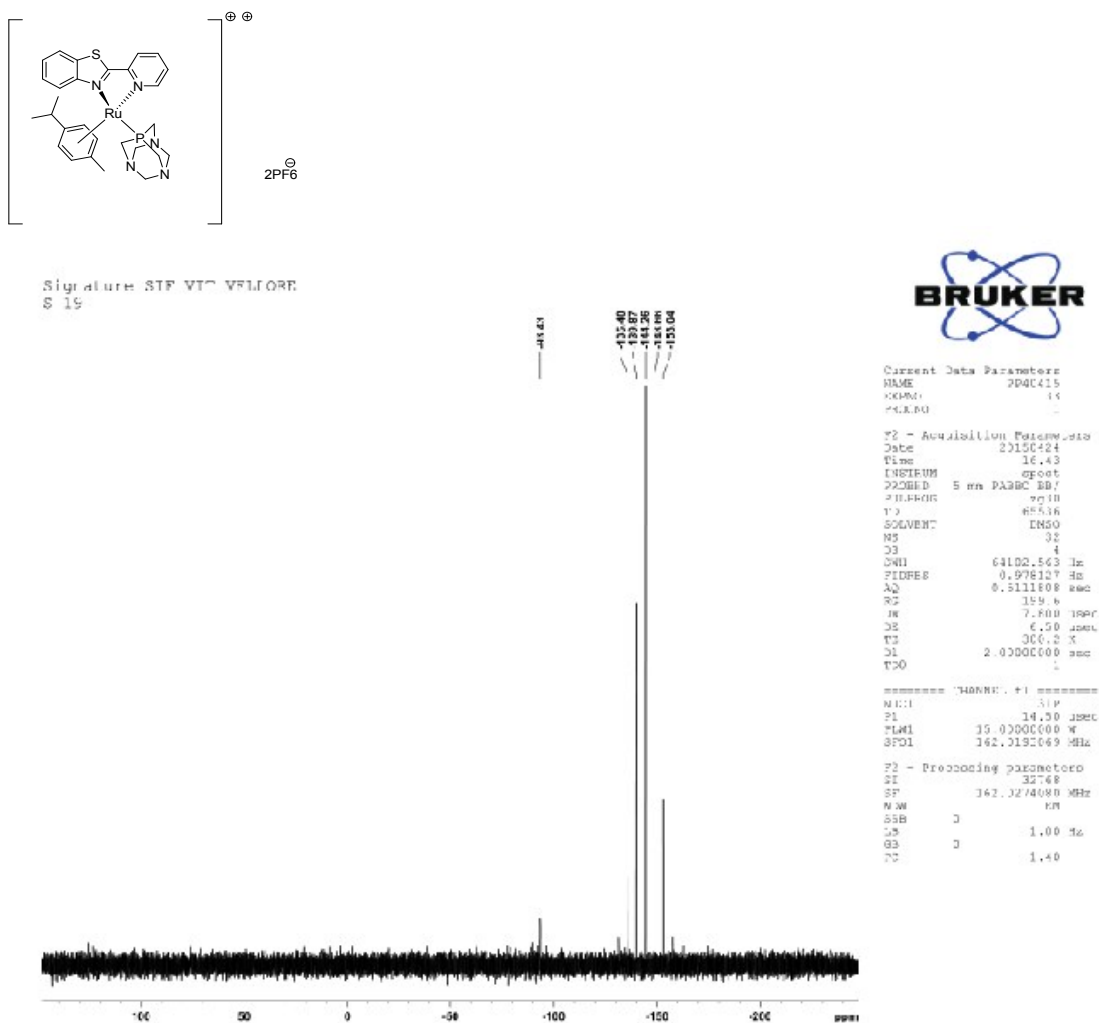

**Figure S29-**  $^{31}\text{P}$  NMR of complex  $[(\eta^6\text{-}p\text{-cymene})\text{RuPTA}\{2\text{-(pyridin-2-yl)benzo[d]thiazole}\}]\cdot 2\text{PF}_6$  (**5a**)

## TOTAL ION CHROMATOGRAMS (TIC)

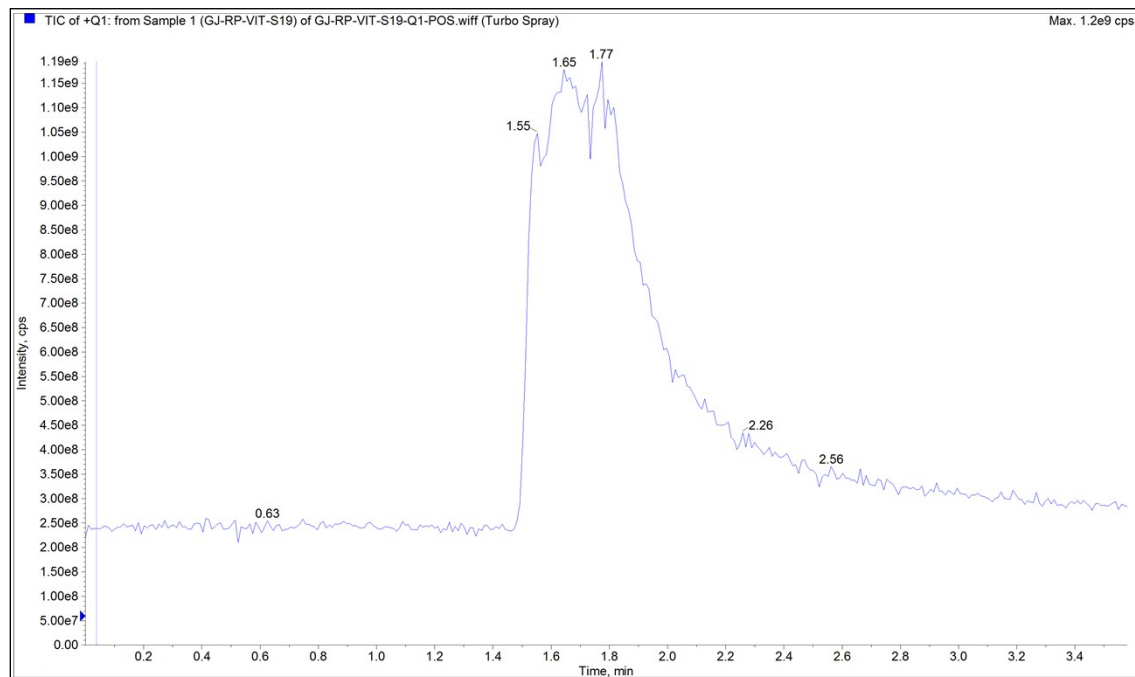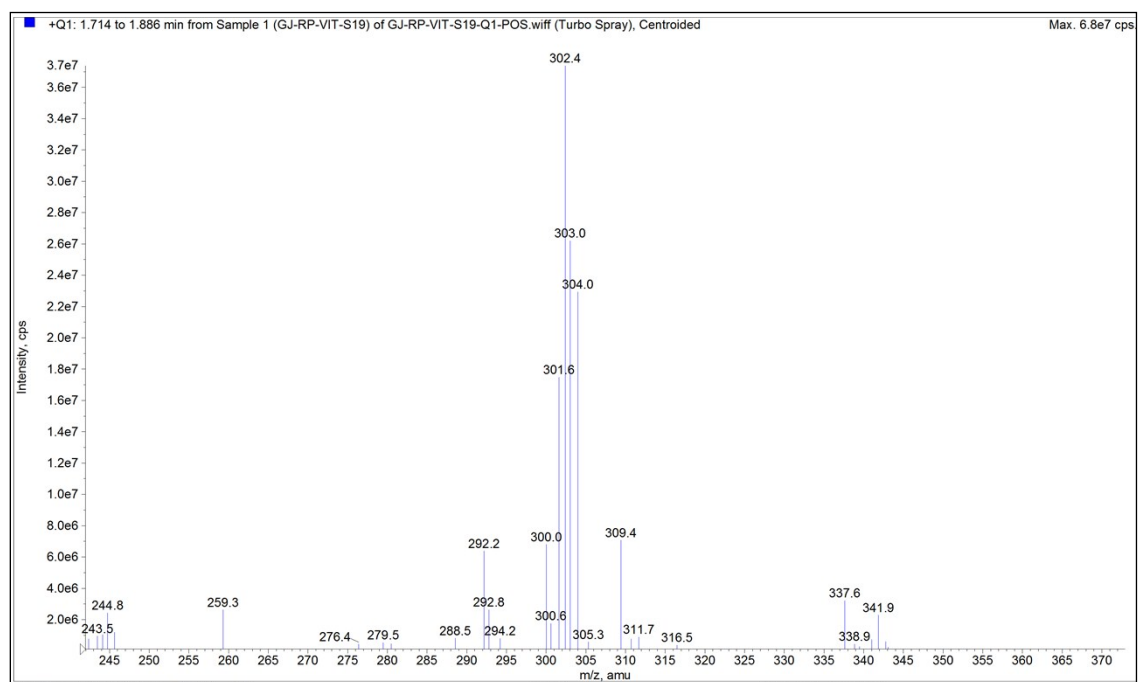

**Figure S30- MS data for compound 5a**



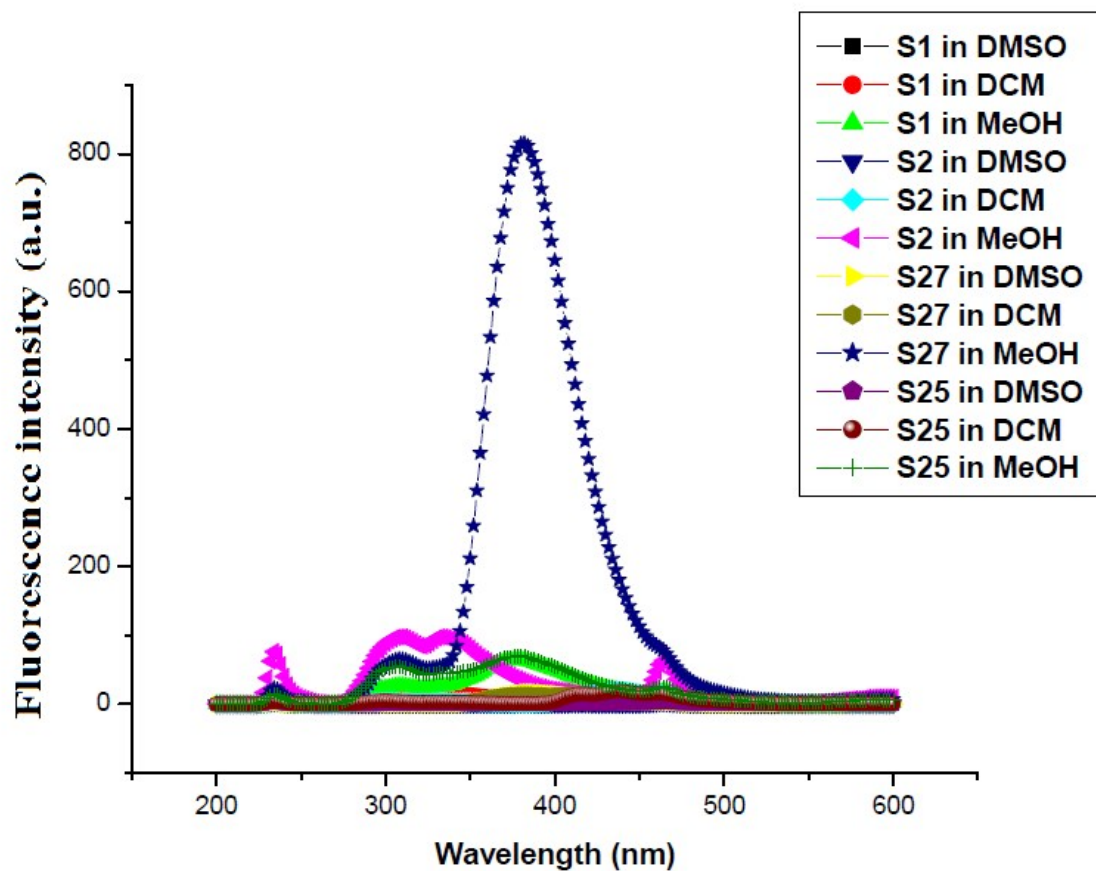

**Figure S31-** Fluorescence spectra of compound 3a (S1), 4a (S2), 3g (S25), 4g (S27)

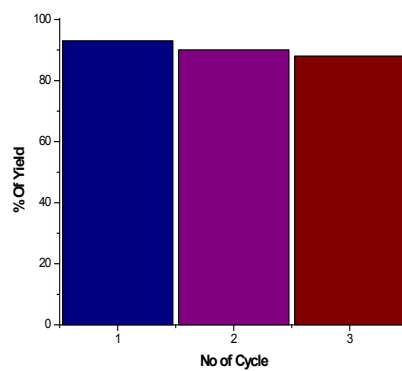

**Figure S32** Reusability of Amberlite IR-120 resin for the synthesis of complex 4a

***In vitro* cytotoxic activities (MTT assay):** *In vitro* cytotoxicity was determined using the standard MTT assay.<sup>[1]</sup> The MTT proliferation assay is based on the reduction of the yellow MTT tetrazolium salt (3-[4,5-dimethylthiazol-2-yl]-2,5diphenyltetrazolium bromide) by mitochondrial dehydrogenases to form a blue MTT formazan in viable cells. Test compounds (**4a-g**, **5a**) were practiced prior to the experiment by dissolving in 0.1% DMSO and then serial dilution with medium. Four different types of cancer cell lines i.e. MCF-7 (breast cancer cell line) and human Epitheloid Cervix Carcinoma (HeLa), A2780 and one normal fibroblast MRC-5 were used in the assay. Approximately  $4 \times 10^3$  cells per well for A2780 and  $1 \times 10^4$  cells per well for either MCF-7 and MRC-5 were cultured in 100  $\mu$ L of a growth medium in 96-well plates and incubated at 37 °C under a 5% CO<sub>2</sub> atmosphere. The cells were then treated with different concentrations of the drugs (1-100  $\mu$ M) in the volume of 100  $\mu$ M /well. Cisplatin has been used as a standard positive control drug. Cells in the control wells accepted the same volume of medium containing 0.1% DMSO. After 24 h, the medium was discarded and cell cultures were incubated with 100  $\mu$ L MTT reagent (1 mg/ml) for 5 h at 37° C. Then the suspension was placed on microvibrator for 10 min and subsequently the absorbance was recorded by the ELISA reader at  $\lambda = 620$  nm. The experiment was also performed in triplicate. The data were expressed as the growth inhibition percentage calculated according to the equation: % growth inhibition =  $100 - [(AD \times 100)/AB]$ , where AD is the measured absorbance in wells containing samples and AB is the absorbance measured for blank wells (cells with a medium and a vehicle). Human cancer cell lines, MCF-7 and HeLa cells were cultured in MEM medium supplemented with 10% FBS, 1% glutamine and 50 mM/ml gentamicin sulphate in a CO<sub>2</sub> incubator in a humidified atmosphere of 5% CO<sub>2</sub> and 95% air. The growth media RPMI 1640 with 10% fetal bovine serum (FBS) and 2 mM Lglutamine in a 95% air, 5% CO<sub>2</sub> atmosphere for A2780 cells, minimum essential medium eagle (EMEM) with 10% FBS in 95% air, 5% CO<sub>2</sub> atmosphere for MRC-5 has been used.

## References

- 1 (a) T. Mossman, *J. Immunol. Methods*, 1983, **65**, 55-63.; (b) S. Saeed, N. Rashid, P. G. Jones, M. Ali and R. Hussain, *Eur. J. Med. Chem.*, 2010, **45**, 1323-1331.
